# Supplementary material for: Spatial genomic heterogeneity in multiple myeloma revealed by multi-region sequencing
Source: PubMed Central journal article supplement (PMC5559527; doi:10.1038/s41467-017-00296-y), 2017-08-16
Supplement: 41467_2017_296_MOESM2_ESM.pdf [file 41467_2017_296_MOESM2_ESM.pdf]

**Supplementary Data 1: Sample origin and purity.**

| PID | Time point | Posterior iliac crest | FNAS 1                                  | FNAS 2                    | FNAS 3                  | FNAS 4            |
|-----|------------|-----------------------|-----------------------------------------|---------------------------|-------------------------|-------------------|
| 1   | Baseline   | left (0.73)*          | L4 (0.97)                               |                           |                         |                   |
| 2   | Baseline   | left (0.85)           | Ilium right (0.99)                      |                           |                         |                   |
| 3   | Baseline   | right (0.8)           | Symphysis pubis (1)                     |                           |                         |                   |
| 4   | Baseline   | right (0.51)          | Ilium left (0.62)                       |                           |                         |                   |
| 5   | Baseline   | right (0.76)          | Ilium right (0.94)                      |                           |                         |                   |
| 6   | Baseline   | left (0.91)           | Sacrum right (0.87)                     |                           |                         |                   |
| 7   | Baseline   | right (0.86)          | T8 (0.96)                               | Ilium left (0.63)         |                         |                   |
| 8   | Baseline   | left (0.94)           | Rib (0.9)                               | Pelvis right (0.94)       | L1 (0.99)               |                   |
| 9   | Baseline   | left (0.91)           | Ilium right (0.96)                      |                           |                         |                   |
| 10  | Baseline   | right (0.96)          | L1 (0.73)                               |                           |                         |                   |
| 11  | Baseline   | left (0.66)           | L4 (0.89)                               |                           |                         |                   |
| 12  | Baseline   | left (0.75)           | T5 (0.97)                               | Sacrum right (0.99)       | Ilium right (0.99)      | Ilium left (0.97) |
| 13  | Baseline   | right (0.91)          | T8 (0.97)                               |                           |                         |                   |
| 14  | Baseline   | right (1)             | Iliac crest right (1)                   |                           |                         |                   |
| 15  | Baseline   | right (0.92)          | Sacrum left (0.98)                      | Sacrum left (0.99)        |                         |                   |
| 16  | Baseline   | right (0.95)          | T5 (0.98)                               |                           |                         |                   |
| 17  | Baseline   | left (0.51)           | Acetabulum left (0.93)                  |                           |                         |                   |
| 18  | Baseline   | left (0.91)           | Ilium right (0.93)                      |                           |                         |                   |
| 19  | Baseline   | right (0.89)          | Clavicle right (0.98)                   |                           |                         |                   |
| 20  | Baseline   | right (0.96)          | T12 (0.78)                              | T8 (0.95)                 | Acetabulum right (0.96) |                   |
| 21  | Baseline   | left (0.89)           | L3 (0.99)                               |                           |                         |                   |
| 22  | Baseline   | left (0.77)           | L5 (0.5)                                |                           |                         |                   |
| 23  | Baseline   | left (0.74)           | Sacrum right (1)                        |                           |                         |                   |
| 24  | Baseline   | right (0.92)          | T7 (0.72)                               |                           |                         |                   |
| 25  | Baseline   | left (0.72)           | T8 (0.89)                               | L2 (0.75)                 | L3 (0.78)               |                   |
| 26  | Baseline   | left (0.98)           | Sacrum left (0.93)                      |                           |                         |                   |
| 27  | Baseline   | left (0.89)           | L1 (0.69)                               |                           |                         |                   |
| 28  | Baseline   | left (1)              | Ischium right (1)                       | Ilium right (1)           |                         |                   |
| 28  | Treated    | right (0.6)           | Pelvis left (0.81)                      |                           |                         |                   |
| 29  | Baseline   | left (0.83)           | Sacrum right (0.86)                     |                           |                         |                   |
| 30  | Baseline   | left (0.93)           | Anterior end of right second rib (0.99) |                           |                         |                   |
| 31  | Baseline   | left (0.88)           | Ilium left (0.94)                       | T10 (0.96)                | L1 (0.93)               |                   |
| 32  | Baseline   | right (0.58)          | Sacrum left (0.9)                       |                           |                         |                   |
| 32  | Treated    | right (0.82)          | Sacrum right (0.63)                     |                           |                         |                   |
| 33  | Baseline   | right (0.52)          | Sacrum right (0.88)                     |                           |                         |                   |
| 34  | Baseline   | right (0.77)          | Pleural fluid (0.99)                    |                           |                         |                   |
| 35  | Baseline   | left (0.94)           | Posterior iliac wing right (0.95)       | Upper sacrum right (0.95) |                         |                   |
| 36  | Baseline   | right (0.8)           | Iliac wing left (0.94)                  |                           |                         |                   |

| PID | Time point | Posterior iliac crest | FNAS 1                       | FNAS 2            | FNAS 3    | FNAS 4 |
|-----|------------|-----------------------|------------------------------|-------------------|-----------|--------|
| 37  | Baseline   | left (0.94)           | Anterior ilium left (0.94)   |                   |           |        |
| 38  | Baseline   | right (1)             | Sacrum right (1)             |                   |           |        |
| 39  | Baseline   | right (0.95)          | Sacrum right (0.96)          |                   |           |        |
| 40  | Baseline   | right (0.6)           | Ilium right (0.92)           |                   |           |        |
| 41  | Baseline   | left (0.84)           | T8 (0.91)                    |                   |           |        |
| 42  | Baseline   | left (0.93)           | Posterior ilium right (0.85) |                   |           |        |
| 43  | Treated    | right (0.68)          | Sacrum right (0.76)          | T9 (0.72)         |           |        |
| 44  | Treated    | right (0.48)          | Sacrum right (0.98)          |                   |           |        |
| 45  | Treated    | -                     | T3 (0.77)                    | T3 (0.89)         |           |        |
| 46  | Treated    | left (0.48)           | L4 (0.52)                    |                   |           |        |
| 47  | Treated    | left (0.58)           | Sacrum right (0.95)          |                   |           |        |
| 48  | Treated    | left (0.77)           | Ischium left (0.93)          | Ilium left (0.99) | T8 (0.95) |        |
| 49  | Treated    | left (0.9)            | Right chest wall mass (0.98) |                   |           |        |
| 50  | Treated    | right (0.87)          | L2 (0.85)                    | Ilium left (0.93) |           |        |
| 51  | Treated    | right (0.89)          | T12 (0.88)                   |                   |           |        |

Values in brackets correspond to sample purity predicted based on WES data; FNAS: fine needle aspirate
