# Supplementary material for: Spatial genomic heterogeneity in multiple myeloma revealed by multi-region sequencing
Source: PubMed Central journal article supplement (PMC5559527; doi:10.1038/s41467-017-00296-y), 2017-08-16
Supplement: 41467_2017_296_MOESM3_ESM.pdf [file 41467_2017_296_MOESM3_ESM.pdf]

Supplementary Data 2: Shared and unshared copy number aberrations.

| PID      | Time point        | RNAS              | FNAS            | Type                             | Region           | Copy RNAS | Copy FNAS |
|----------|-------------------|-------------------|-----------------|----------------------------------|------------------|-----------|-----------|
| 1        | Baseline          | Iliac crest left  | L4              | shared                           | 5p15.33-5q11.1   | 3         | 3         |
|          |                   |                   |                 | shared                           | 7                | 3         | 3         |
|          |                   |                   |                 | shared                           | 9                | 3         | 3         |
|          |                   |                   |                 | shared                           | 15q11.1-15q11.2  | 3         | 3         |
|          |                   |                   |                 | shared                           | 15q14            | 3         | 3         |
|          |                   |                   |                 | shared                           | 19p13.3-19q12    | 3         | 3         |
|          |                   |                   |                 | unshared                         | 1p36.33-1p36.31  | 2         | 1         |
|          |                   |                   |                 | unshared                         | 1p36.12          | 2         | 1         |
|          |                   |                   |                 | unshared                         | 1p36.11          | 2         | 1         |
|          |                   |                   |                 | unshared                         | 1p36.11-1p35.1   | 2         | 1         |
|          |                   |                   |                 | unshared                         | 1p34.3-1p11.2    | 2         | 1         |
|          |                   |                   |                 | unshared                         | 3p21.1           | 2         | 3         |
|          |                   |                   |                 | unshared                         | 4                | 2         | 1         |
|          |                   |                   |                 | unshared                         | 5q11.2-5q21.1    | 3         | 1         |
|          |                   |                   |                 | unshared                         | 5q21.1-5q21.2    | 3         | 2         |
|          |                   |                   |                 | unshared                         | 5q21.3-5q35.3    | 3         | 1         |
|          |                   |                   |                 | unshared                         | 13               | 2         | 1         |
|          |                   |                   |                 | unshared                         | 15q11.2-15q13.3  | 3         | 2         |
|          |                   |                   |                 | unshared                         | 15q13.3-15q14    | 3         | 2         |
|          |                   |                   |                 | unshared                         | 15q14-15q26.3    | 3         | 2         |
| unshared | 16p13.3-16p12.1   | 2                 | 1               |                                  |                  |           |           |
| unshared | 17p13.3-17q21.31  | 2                 | 1               |                                  |                  |           |           |
| unshared | 17q21.31-17q25.3  | 2                 | 2 LOH           |                                  |                  |           |           |
| unshared | 19q12-19q13.12    | 3                 | 2               |                                  |                  |           |           |
| unshared | 19q13.12-19q13.43 | 3                 | 1               |                                  |                  |           |           |
| 2        | Baseline          | Iliac crest left  | Ilium right     | shared (minor sub-clone in RNAS) | 1q21.1-1q44      | 2 LOH     | 2 LOH     |
|          |                   |                   |                 | shared                           | 3                | 3         | 3         |
|          |                   |                   |                 | shared                           | 7                | 3         | 3         |
|          |                   |                   |                 | shared                           | 8p23.3-8p11.1    | 1         | 1         |
|          |                   |                   |                 | shared                           | 9                | 4         | 4         |
|          |                   |                   |                 | shared                           | 11               | 3         | 3         |
|          |                   |                   |                 | shared                           | 15               | 4         | 4         |
|          |                   |                   |                 | shared                           | 19p13.3-19q13.43 | 3         | 3         |
|          |                   |                   |                 | unshared                         | 4p15.1-4p16.3    | 2 LOH     | 1         |
|          |                   |                   |                 | unshared                         | 4p15.1-4q35.2    | 2 LOH     | 3         |
| unshared | 5                 | 4                 | 3               |                                  |                  |           |           |
| unshared | 6q                | 2                 | 1               |                                  |                  |           |           |
| unshared | 8q                | 3                 | 2               |                                  |                  |           |           |
| 3        | Baseline          | Iliac crest right | Symphysis pubis | shared                           | 11q13.3-11q25    | 3         | 3         |
|          |                   |                   |                 | unshared                         | -                | -         | -         |

| PID      | Time point      | RNAS              | FNAS        | Type                             | Region            | Copy RNAS | Copy FNAS |
|----------|-----------------|-------------------|-------------|----------------------------------|-------------------|-----------|-----------|
| 4        | Baseline        | Iliac crest right | Ilium left  | shared                           | 8p23.3-8p11.1     | 1         | 1         |
|          |                 |                   |             | shared                           | 8q11.23-8q13.3    | 1         | 1         |
|          |                 |                   |             | shared                           | 8q21.13-8q24.3    | 1         | 1         |
|          |                 |                   |             | shared                           | 9p24.3-9q34.3     | 3         | 3         |
|          |                 |                   |             | shared                           | 12q11-12q12       | 1         | 1         |
|          |                 |                   |             | shared                           | 12q12-12q24.33    | 1         | 1         |
|          |                 |                   |             | shared                           | 14q22.3-14q32.33  | 1         | 1         |
|          |                 |                   |             | shared                           | 16p11.2-16p11.1   | 3         | 3         |
|          |                 |                   |             | shared                           | 17p13.3-17p13.1   | 3         | 3         |
|          |                 |                   |             | shared                           | 17p13.1           | 1         | 1         |
|          |                 |                   |             | shared                           | 17p13.1-17p12     | 3         | 3         |
|          |                 |                   |             | shared                           | 17p12             | 1         | 1         |
|          |                 |                   |             | shared                           | 17p12-17p11.1     | 3         | 3         |
|          |                 |                   |             | shared                           | 17q11.1-17q11.2   | 1         | 1         |
|          |                 |                   |             | shared                           | 17q12-17q21.31    | 1         | 1         |
|          |                 |                   |             | shared                           | 17q21.31-17q21.32 | 3         | 3         |
|          |                 |                   |             | shared                           | 17q21.32-17q21.33 | 1         | 1         |
|          |                 |                   |             | shared                           | 17q21.33-17q25.3  | 3         | 3         |
|          |                 |                   |             | shared                           | 20p12.3-20p12.2   | 1         | 1         |
|          |                 |                   |             | shared                           | 22q11.1-22q12.2   | 1         | 1         |
|          |                 |                   |             | shared                           | 22q12.3-22q13.1   | 4         | 4         |
|          |                 |                   |             | unshared                         | 1q                | 2         | 2 LOH     |
|          |                 |                   |             | unshared                         | 16q11.2-16q23.3   | 2         | 1         |
|          |                 |                   |             | unshared                         | 16q23.3-16q24.3   | 2         | 2 LOH     |
|          |                 |                   |             | unshared                         | 22q12.2-22q12.3   | 3         | 1         |
|          |                 |                   |             | unshared                         | 22q12.3           | 3         | 4         |
| unshared | 22q13.1-22q13.2 | 1                 | 2           |                                  |                   |           |           |
| 5        | Baseline        | Iliac crest right | Ilium right | shared (minor sub-clone in RNAS) | 1q21.1-1q44       | 4         | 4         |
|          |                 |                   |             | shared                           | 4p16.3            | 1         | 1         |
|          |                 |                   |             | shared                           | 6p11.2-6q11.1     | 3         | 3         |
|          |                 |                   |             | shared                           | 8p23.3-8p11.21    | 1         | 1         |
|          |                 |                   |             | shared (minor sub-clone in RNAS) | 11                | 3         | 3         |
|          |                 |                   |             | shared                           | 12p11.1-12q11     | 3         | 3         |
|          |                 |                   |             | shared                           | 16p11.2-16q24.3   | 3         | 3         |
|          |                 |                   |             | unshared                         | 2                 | 2         | 3         |
|          |                 |                   |             | unshared                         | 3p26.3-3p14.1     | 2         | 2 LOH     |
|          |                 |                   |             | unshared                         | 3p14.1-3q29       | 2         | 3         |
|          |                 |                   |             | unshared                         | 4p16.2-4q35.2     | 2         | 3         |
| unshared | 6p25.3-6q11     | 2                 | 3           |                                  |                   |           |           |

| PID      | Time point      | RNAS                     | FNAS                | Type     | Region            | Copy RNAS | Copy FNAS |
|----------|-----------------|--------------------------|---------------------|----------|-------------------|-----------|-----------|
|          |                 |                          |                     | unshared | 6q12              | 3         | 5         |
|          |                 |                          |                     | unshared | 6q12-6q27         | 1         | 2 LOH     |
|          |                 |                          |                     | unshared | 7                 | 2         | 3         |
|          |                 |                          |                     | unshared | 8p11.21-8q24.3    | 3         | 4         |
|          |                 |                          |                     | unshared | 9                 | 2         | 3         |
|          |                 |                          |                     | unshared | 15q22.31-15q26.3  | 2         | 3         |
|          |                 |                          |                     | unshared | 16p13.3-16p11.2   | 2         | 3         |
|          |                 |                          |                     | unshared | 19                | 2         | 3         |
|          |                 |                          |                     | unshared | 20                | 2         | 3         |
|          |                 |                          |                     | unshared | 22                | 2         | 3         |
|          |                 |                          |                     |          |                   |           |           |
| <b>6</b> | <b>Baseline</b> | <b>Iliac crest left</b>  | <b>Sacrum right</b> | shared   | 3                 | 3         | 3         |
|          |                 |                          |                     | shared   | 4                 | 3         | 3         |
|          |                 |                          |                     | shared   | 5                 | 4         | 4         |
|          |                 |                          |                     | shared   | 6                 | 3         | 3         |
|          |                 |                          |                     | shared   | 9p24.3-9p21.1     | 4         | 4         |
|          |                 |                          |                     | shared   | 9p21.1-9p11.2     | 3         | 3         |
|          |                 |                          |                     | shared   | 9q12-9q33.2       | 4         | 4         |
|          |                 |                          |                     | shared   | 9q33.2-9q34.11    | 3         | 3         |
|          |                 |                          |                     | shared   | 9q34.11-9q34.3    | 4         | 4         |
|          |                 |                          |                     | shared   | 11                | 3         | 3         |
|          |                 |                          |                     | shared   | 15                | 4         | 4         |
|          |                 |                          |                     | shared   | 19                | 3         | 3         |
|          |                 |                          |                     | shared   | 20                | 3         | 3         |
|          |                 |                          |                     | shared   | 21                | 3         | 3         |
|          |                 |                          |                     | unshared | -                 | -         | -         |
|          |                 |                          |                     |          |                   |           |           |
| <b>7</b> | <b>Baseline</b> | <b>Iliac crest right</b> | <b>T8</b>           | shared   | 2p25.3-2p11.2     | 3         | 3         |
|          |                 |                          |                     | shared   | 5                 | 3         | 3         |
|          |                 |                          |                     | shared   | 6p25.3-6q23.3     | 3         | 3         |
|          |                 |                          |                     | shared   | 8q12.3-8q24.21    | 3         | 3         |
|          |                 |                          |                     | shared   | 9                 | 3         | 3         |
|          |                 |                          |                     | shared   | 10p15.3-10p13     | 1         | 1         |
|          |                 |                          |                     | shared   | 10p12.1-10p11.22  | 1         | 1         |
|          |                 |                          |                     | shared   | 10p11.22-10q11.21 | 1         | 1         |
|          |                 |                          |                     | shared   | 11                | 3         | 3         |
|          |                 |                          |                     | shared   | 15                | 5         | 5         |
|          |                 |                          |                     | shared   | 19p13.3-19q13.43  | 3         | 3         |
|          |                 |                          |                     | shared   | 21                | 3         | 3         |
|          |                 |                          |                     | unshared | 1q41              | 1         | 2         |
|          |                 |                          |                     | unshared | 1q41-1q42.12      | 1         | 2         |
|          |                 |                          |                     |          |                   |           |           |
|          |                 | <b>Iliac crest right</b> | <b>Ilium left</b>   | shared   | 2p25.3-2p13.1     | 3         | 3         |
|          |                 |                          |                     | shared   | 5                 | 3         | 3         |
|          |                 |                          |                     | shared   | 6p25.3-6q22.31    | 3         | 3         |

| PID       | Time point      | RNAS                     | FNAS                | Type              | Region                   | Copy RNAS | Copy FNAS |
|-----------|-----------------|--------------------------|---------------------|-------------------|--------------------------|-----------|-----------|
|           |                 |                          |                     | shared            | 9                        | 3         | 3         |
|           |                 |                          |                     | shared            | 10p15.3-10p13            | 1         | 1         |
|           |                 |                          |                     | shared            | 10p12.1-10p11.22         | 1         | 1         |
|           |                 |                          |                     | shared            | 10p11.22-10q11.21        | 1         | 1         |
|           |                 |                          |                     | shared            | 11p14.1-11q25            | 3         | 3         |
|           |                 |                          |                     | shared            | 15                       | 5         | 5         |
|           |                 |                          |                     | shared            | 19p13.3-19q13.42         | 3         | 3         |
|           |                 |                          |                     | shared            | 21                       | 3         | 3         |
|           |                 |                          |                     | unshared          | 1q41                     | 1         | 2         |
|           |                 |                          |                     | unshared          | 1q41-1q42.12             | 1         | 2         |
|           |                 |                          |                     | unshared          | 2p13.1-2p11.2            | 3         | 3         |
|           |                 |                          |                     | unshared          | 4q13.2-4q35.2            | 2         | 3         |
|           |                 |                          |                     | unshared          | 6q22.31-6q23.3           | 3         | 2 LOH     |
|           |                 |                          |                     | unshared          | 6q23.3-6q27              | 2         | 2 LOH     |
|           |                 |                          |                     | unshared          | 8q12.3-8q24.21           | 3         | 2         |
|           |                 |                          |                     | unshared          | 11p15.5-11p14.1          | 3         | 2         |
|           |                 |                          |                     | unshared          | 19q13.42-19q13.43        | 3         | 2         |
| <b>8</b>  | <b>Baseline</b> | <b>Iliac crest left</b>  | <b>Rib</b>          | shared            | 6p25.3-6q22.32           | 3         | 3         |
|           |                 |                          |                     | shared            | 6q22.32-6q22.33          | 1         | 1         |
|           |                 |                          |                     | shared            | 6q22.33                  | 3         | 3         |
|           |                 |                          |                     | shared            | 6q23.1-6q23.2            | 1         | 1         |
|           |                 |                          |                     | shared            | 6q23.2-6q23.3            | 3         | 3         |
|           |                 |                          |                     | shared            | 6q23.3-6q24.1            | 1         | 1         |
|           |                 |                          |                     | shared            | 6q24.1                   | 3         | 3         |
|           |                 |                          |                     | shared            | 6q24.1-6q27              | 1         | 1         |
|           |                 |                          |                     | shared            | 7                        | 3         | 3         |
|           |                 |                          |                     | shared            | 8q24.21                  | 3         | 3         |
|           |                 |                          |                     | shared            | 13                       | 1         | 1         |
|           |                 |                          |                     | shared            | 15                       | 3         | 3         |
|           |                 |                          |                     | shared            | 19                       | 3         | 3         |
|           |                 |                          |                     | shared            | 22q11.21-22q11.23        | 3         | 3         |
|           |                 |                          |                     | unshared          | 1q                       | 4         | 4 LOH     |
|           |                 | <b>Iliac crest left</b>  | <b>Pelvis right</b> | shared            | <b>like rib</b>          |           |           |
|           |                 |                          |                     | additional shared | 1q21.1-1q44              | 4         | 4         |
|           |                 |                          |                     | unshared          | -                        | -         | -         |
|           |                 | <b>Iliac crest left</b>  | <b>L1</b>           | shared            | <b>like pelvis right</b> |           |           |
|           |                 |                          |                     | unshared          | -                        | -         | -         |
| <b>9</b>  | <b>Baseline</b> | <b>Iliac crest left</b>  | <b>Ilium right</b>  | shared            | 16q11.2-16q24.3          | 2 LOH     | 2 LOH     |
|           |                 |                          |                     | unshared          | -                        | -         | -         |
| <b>10</b> | <b>Baseline</b> | <b>Iliac crest right</b> | <b>L1</b>           | shared            | 1q21.1-1q44              | 3         | 3         |
|           |                 |                          |                     | shared            | 2q37.3-2q37.3            | 1         | 1         |

| PID       | Time point      | RNAS                    | FNAS      | Type     | Region           | Copy RNAS | Copy FNAS |
|-----------|-----------------|-------------------------|-----------|----------|------------------|-----------|-----------|
|           |                 |                         |           | shared   | 6q22.31-6q27     | 1         | 1         |
|           |                 |                         |           | shared   | 9p13.2-9p13.1    | 4         | 4         |
|           |                 |                         |           | shared   | 9q21.33-9q22.31  | 1         | 1         |
|           |                 |                         |           | shared   | 11p15.5-11p11.12 | 1         | 1         |
|           |                 |                         |           | shared   | 11q13.1-11q13.4  | 4         | 4         |
|           |                 |                         |           | shared   | 11q13.4-11q14.1  | 3         | 3         |
|           |                 |                         |           | shared   | 11q14.2-11q22.2  | 1         | 1         |
|           |                 |                         |           | shared   | 11q22.3-11q23.1  | 3         | 3         |
|           |                 |                         |           | shared   | 11q23.1-11q23.3  | 1         | 1         |
|           |                 |                         |           | shared   | 11q23.3          | 3         | 3         |
|           |                 |                         |           | shared   | 11q23.3-11q24.1  | 4         | 4         |
|           |                 |                         |           | shared   | 11q24.1-11q24.2  | 1         | 1         |
|           |                 |                         |           | shared   | 11q24.2-11q25    | 3         | 3         |
|           |                 |                         |           | shared   | 13               | 1         | 1         |
|           |                 |                         |           | shared   | 16q12.1-16q24.3  | 1         | 1         |
|           |                 |                         |           | unshared | 4p16.3           | 1         | 2         |
|           |                 |                         |           | unshared | 5p15.33-5p15.2   | 3         | 2         |
|           |                 |                         |           | unshared | 15q21.1-15q26.3  | 3         | 2         |
|           |                 |                         |           |          |                  |           |           |
| <b>11</b> | <b>Baseline</b> | <b>Iliac crest left</b> | <b>L4</b> | shared   | 3                | 3         | 3         |
|           |                 |                         |           | shared   | 5                | 3         | 3         |
|           |                 |                         |           | shared   | 6p25.3-6p11.1    | 3         | 3         |
|           |                 |                         |           | shared   | 6q11.1-6q27      | 2 LOH     | 2 LOH     |
|           |                 |                         |           | shared   | 7                | 3         | 3         |
|           |                 |                         |           | shared   | 8p23.3-8p11.21   | 1         | 1         |
|           |                 |                         |           | shared   | 9                | 3         | 3         |
|           |                 |                         |           | shared   | 13               | 1         | 1         |
|           |                 |                         |           | shared   | 14q22.1-14q31.1  | 1         | 1         |
|           |                 |                         |           | shared   | 15               | 3         | 3         |
|           |                 |                         |           | shared   | 19               | 3         | 3         |
|           |                 |                         |           | shared   | 20p13-20p11.21   | 1         | 1         |
|           |                 |                         |           | shared   | 21               | 3         | 3         |
|           |                 |                         |           | unshared | -                | -         | -         |
|           |                 |                         |           |          |                  |           |           |
| <b>12</b> | <b>Baseline</b> | <b>Iliac crest left</b> | <b>T5</b> | shared   | 5                | 3         | 3         |
|           |                 |                         |           | shared   | 9p24.3-9p13.2    | 3         | 3         |
|           |                 |                         |           | shared   | 9p13.2-9p11.2    | 3         | 3         |
|           |                 |                         |           | shared   | 15q11.1-15q22.31 | 3         | 3         |
|           |                 |                         |           | shared   | 15q22.33-15q26.3 | 3         | 3         |
|           |                 |                         |           | shared   | 19p13.3-19p11    | 3         | 3         |
|           |                 |                         |           | unshared | 1p36.33-1p13.1   | 2         | 2 LOH     |
|           |                 |                         |           | unshared | 1p32.3           | 2         | 0         |
|           |                 |                         |           | unshared | 1q               | 2         | 3         |
|           |                 |                         |           | unshared | 3q26.32          | 2         | 1         |
|           |                 |                         |           | unshared | 4q13.1-4q22.1    | 2         | 1         |
|           |                 |                         |           | unshared | 7p12.3           | 1         | 2         |

| PID | Time point | RNAS              | FNAS         | Type                | Region            | Copy RNAS | Copy FNAS |
|-----|------------|-------------------|--------------|---------------------|-------------------|-----------|-----------|
|     |            |                   |              | unshared            | 8p                | 2         | 1         |
|     |            |                   |              | unshared            | 9p13.2            | 3         | 2 LOH     |
|     |            |                   |              | unshared            | 9q                | 3         | 2 LOH     |
|     |            |                   |              | unshared            | 15q22.31-15q22.33 | 3         | 2         |
|     |            |                   |              | unshared            | 17p13.3-17p12     | 2         | 1         |
|     |            |                   |              | unshared            | 19q               | 3         | 2         |
|     |            |                   |              | unshared            | 22q11.21          | 2         | 3         |
|     |            |                   |              | unshared            | 22q11.23-22q13.33 | 2         | 1         |
|     |            |                   |              |                     |                   |           |           |
|     |            | Iliac crest left  | Sacrum right | shared              | Like T5           |           |           |
|     |            |                   |              | unshared            | Like T5           |           |           |
|     |            |                   |              |                     |                   |           |           |
|     |            | Iliac crest left  | Ilium right  | shared              | Like T5           |           |           |
|     |            |                   |              | unshared            | Like T5           |           |           |
|     |            |                   |              |                     |                   |           |           |
|     |            | Iliac crest left  | Ilium left   | shared              | Like T5           |           |           |
|     |            |                   |              | unshared            | Like T5           |           |           |
|     |            |                   |              | additional unshared | 3q26.33           | 2         | 1         |
|     |            |                   |              |                     |                   |           |           |
| 13  | Baseline   | Iliac crest right | T8           | shared              | 1q24.2-1q25.2     | 1         | 1         |
|     |            |                   |              | shared              | 3p26.3-3p21.31    | 3         | 3         |
|     |            |                   |              | shared              | 3p21.31-3q13.31   | 3         | 3         |
|     |            |                   |              | shared              | 3q13.31-3q13.33   | 2 LOH     | 2 LOH     |
|     |            |                   |              | shared              | 3q13.33-3q22.1    | 1         | 1         |
|     |            |                   |              | shared              | 3q22.1-3q23       | 2 LOH     | 2 LOH     |
|     |            |                   |              | shared              | 3q23              | 1         | 1         |
|     |            |                   |              | shared              | 3q23-3q24         | 2 LOH     | 2 LOH     |
|     |            |                   |              | shared              | 3q24-3q29         | 3         | 3         |
|     |            |                   |              | shared              | 5p15.33-5q22.1    | 3         | 3         |
|     |            |                   |              | shared              | 5q22.3-5q31.1     | 3         | 3         |
|     |            |                   |              | shared              | 5q34-5q35.3       | 3         | 3         |
|     |            |                   |              | shared              | 8q24.21-8q24.3    | 1         | 1         |
|     |            |                   |              | shared              | 9q21.11-9q22.33   | 3         | 3         |
|     |            |                   |              | shared              | 10q24.32-10q25.2  | 1         | 1         |
|     |            |                   |              | shared              | 11p15.5-11p13     | 3         | 3         |
|     |            |                   |              | shared              | 11p13-11p12       | 2 LOH     | 2 LOH     |
|     |            |                   |              | shared              | 11p12-11q13.1     | 3         | 3         |
|     |            |                   |              | shared              | 11q13.2-11q22.3   | 2 LOH     | 2 LOH     |
|     |            |                   |              | shared              | 11q22.3-11q23.1   | 4         | 4         |
|     |            |                   |              | shared              | 11q23.1-11q23.3   | 2 LOH     | 2 LOH     |
|     |            |                   |              | shared              | 11q23.3           | 3         | 3         |
|     |            |                   |              | shared              | 11q23.3-11q24.3   | 4         | 4         |
|     |            |                   |              | shared              | 11q24.3-11q25     | 5         | 5         |
|     |            |                   |              | shared              | 11q25             | 3         | 3         |
|     |            |                   |              | shared              | 11q25             | 2 LOH     | 2 LOH     |

| PID       | Time point      | RNAS                     | FNAS                     | Type                              | Region            | Copy RNAS | Copy FNAS |
|-----------|-----------------|--------------------------|--------------------------|-----------------------------------|-------------------|-----------|-----------|
|           |                 |                          |                          | shared                            | 12p13.31-12p12.2  | 1         | 1         |
|           |                 |                          |                          | shared                            | 12p11.1-12q12     | 3         | 3         |
|           |                 |                          |                          | shared                            | 15                | 3         | 3         |
|           |                 |                          |                          | shared                            | 16p13.3           | 1         | 1         |
|           |                 |                          |                          | shared                            | 16q11.2-16q22.1   | 3         | 3         |
|           |                 |                          |                          | shared                            | 16q23.3-16q24.1   | 1         | 1         |
|           |                 |                          |                          | shared                            | 19p13.3-19q13.11  | 3         | 3         |
|           |                 |                          |                          | shared<br>(minor sub-clone at T8) | 19q13.11-19q13.43 | 3         | 3         |
|           |                 |                          |                          | shared                            | 19q13.43          | 3         | 3         |
|           |                 |                          |                          | shared                            | 21p11.2-21q11.2   | 3         | 3         |
|           |                 |                          |                          | shared                            | 22q11.1-22q11.21  | 1         | 1         |
|           |                 |                          |                          | unshared                          | 1p31.3-1p21.1     | 2         | 1         |
|           |                 |                          |                          | unshared                          | 1p21.1-1p13.3     | 2         | 1         |
|           |                 |                          |                          | unshared                          | 1p13.2-1p12       | 2         | 1         |
|           |                 |                          |                          | unshared                          | 1q25.2-q25.3      | 2         | 1         |
|           |                 |                          |                          | unshared                          | 2p22.3-p22.1      | 2         | 1         |
|           |                 |                          |                          | unshared                          | 4q11-4q12         | 2         | 1         |
|           |                 |                          |                          | unshared                          | 4q21.1-4q24       | 2         | 1         |
|           |                 |                          |                          | unshared                          | 4q26-4q27         | 2         | 1         |
|           |                 |                          |                          | unshared                          | 4q28.3-4q31.1     | 2         | 1         |
|           |                 |                          |                          | unshared                          | 4q31.21-4q31.23   | 2         | 1         |
|           |                 |                          |                          | unshared                          | 5q22.1-4q22.3     | 3         | 2         |
|           |                 |                          |                          | unshared                          | 5q31.1-4q31.3     | 3         | 2 LOH     |
|           |                 |                          |                          | unshared                          | 5q31.3-5q32       | 3         | 1         |
|           |                 |                          |                          | unshared                          | 5q32-5q33.3       | 2         | 1         |
|           |                 |                          |                          | unshared                          | 5q33.3-5q34       | 2         | 2 LOH     |
|           |                 |                          |                          | unshared                          | 5q34              | 2         | 3         |
|           |                 |                          |                          | unshared                          | 6q21              | 2         | 1         |
|           |                 |                          |                          | unshared                          | 6q24.1-6q24.2     | 1         | 2         |
|           |                 |                          |                          | unshared                          | 6q25.2-6q25.3     | 1         | 2         |
|           |                 |                          |                          | unshared                          | 8p21.2-8p21.1     | 2         | 1         |
|           |                 |                          |                          | unshared                          | 8p11.21-8p11.1    | 2         | 1         |
|           |                 |                          |                          | unshared                          | 9                 | 4         | 3         |
|           |                 |                          |                          | unshared                          | 12p13.33-12p13.31 | 1         | 2         |
|           |                 |                          |                          | unshared                          | 12p12.2-12p11.1   | 1         | 2         |
|           |                 |                          |                          | unshared                          | 12q21.31-q23.3    | 1         | 2         |
|           |                 |                          |                          | unshared                          | 13q13.3-q21.31    | 1         | 2         |
|           |                 |                          |                          | unshared                          | 14q21.1           | 2         | 1         |
|           |                 |                          |                          | unshared                          | 18                | 3         | 2 LOH     |
| <b>14</b> | <b>Baseline</b> | <b>Iliac crest right</b> | <b>Iliac crest right</b> | shared                            | 11q13.3-11q25     | 3         | 3         |
|           |                 |                          |                          | unshared                          | 7p22.3-7p21.2     | 2         | 1         |

| PID | Time point | RNAS              | FNAS             | Type                             | Region               | Copy RNAS | Copy FNAS |
|-----|------------|-------------------|------------------|----------------------------------|----------------------|-----------|-----------|
| 15  | Baseline   | Iliac crest right | Sacrum left FL1  | shared                           | 1p22.3-1p11.2        | 1         | 1         |
|     |            |                   |                  | shared                           | 1q25.1-1q25.3        | 1         | 1         |
|     |            |                   |                  | shared (minor sub-clone in RNAS) | 2p25.3-2p23.2        | 1         | 1         |
|     |            |                   |                  | shared                           | 3                    | 3         | 3         |
|     |            |                   |                  | shared                           | 4q31.22-4q31.23      | 1         | 1         |
|     |            |                   |                  | shared                           | 5p15.33-5q32         | 3         | 3         |
|     |            |                   |                  | shared                           | 5q33.1               | 2 LOH     | 2 LOH     |
|     |            |                   |                  | shared                           | 5q33.1-5q33.3        | 3         | 3         |
|     |            |                   |                  | shared                           | 6q14.1-6q27          | 1         | 1         |
|     |            |                   |                  | shared                           | 8p23.3-8p11.22       | 1         | 1         |
|     |            |                   |                  | shared                           | 9                    | 3         | 3         |
|     |            |                   |                  | shared                           | 11p11.2-11q25        | 3         | 3         |
|     |            |                   |                  | shared                           | 12p13.33-12p12.3     | 1         | 1         |
|     |            |                   |                  | shared                           | 12p11.21-12q13.11    | 1         | 1         |
|     |            |                   |                  | shared                           | 13                   | 1         | 1         |
|     |            |                   |                  | shared                           | 15                   | 4         | 4         |
|     |            |                   |                  | shared                           | 19p13.3-19q13.2      | 3         | 3         |
|     |            |                   |                  | shared                           | 19q13.31-19q13.43    | 3         | 3         |
|     |            |                   |                  | shared                           | 22q11.1-22q11.21     | 1         | 1         |
|     |            |                   |                  | shared                           | 22q12.1-22q12.2      | 1         | 1         |
|     |            |                   |                  | shared                           | 22q12.3              | 1         | 1         |
|     |            |                   |                  | shared                           | 22q13.31-22q13.33    | 1         | 1         |
|     |            |                   |                  | unshared                         | 12q21.1-12q24.12     | 2         | 1         |
|     |            |                   |                  |                                  |                      |           |           |
|     |            | Iliac crest right | Sacrum left FL 2 | shared                           | like Sacrum left FL1 |           |           |
|     |            |                   |                  | unshared                         | like Sacrum left FL1 |           |           |
|     |            |                   |                  |                                  |                      |           |           |
| 16  | Baseline   | Iliac crest right | T5               | shared                           | 1p31.1-1p11.2        | 1         | 1         |
|     |            |                   |                  | shared                           | 1q21.1-1q21.3        | 3         | 3         |
|     |            |                   |                  | shared                           | 1q24.2-1q24.3        | 3         | 3         |
|     |            |                   |                  | shared                           | 1q31.2-1q43          | 3         | 3         |
|     |            |                   |                  | shared                           | 4p16.3-4q12          | 1         | 1         |
|     |            |                   |                  | shared                           | 4q12-4q13.1          | 1         | 1         |
|     |            |                   |                  | shared                           | 4q13.1-4q13.3        | 1         | 1         |
|     |            |                   |                  | shared                           | 4q28.2-4q35.2        | 1         | 1         |
|     |            |                   |                  | shared                           | 8q23.1-8q24.3        | 3         | 3         |
|     |            |                   |                  | shared                           | 10p15.3-10p15.1      | 1         | 1         |
|     |            |                   |                  | shared                           | 12p13.33-12p12.3     | 3         | 3         |
|     |            |                   |                  | shared                           | 13q11-13q14.21.1     | 1         | 1         |
|     |            |                   |                  | shared                           | 13q32.3-13q34        | 1         | 1         |
|     |            |                   |                  | shared                           | 15q13.1-15q21.1      | 3         | 3         |



| PID | Time point | RNAS              | FNAS            | Type     | Region            | Copy RNAS | Copy FNAS |
|-----|------------|-------------------|-----------------|----------|-------------------|-----------|-----------|
|     |            |                   |                 | shared   | 15q21.1-15q26.3   | 4         | 4         |
|     |            |                   |                 | shared   | 16p13.3-16q24.3   | 1         | 1         |
|     |            |                   |                 | shared   | 17p13.3-17p12     | 1         | 1         |
|     |            |                   |                 | shared   | 17q23.2-17q25.3   | 1         | 1         |
|     |            |                   |                 | unshared | 5p13.1-15.33      | 4         | 3         |
|     |            |                   |                 | unshared | 12q24.31-12q24.32 | 2         | 1         |
|     |            |                   |                 |          |                   |           |           |
| 17  | Baseline   | Iliac crest left  | Acetabulum left | shared   | 1q21.1-1q44       | 3         | 3         |
|     |            |                   |                 | shared   | 3                 | 3         | 3         |
|     |            |                   |                 | shared   | 5                 | 3         | 3         |
|     |            |                   |                 | shared   | 7                 | 3         | 3         |
|     |            |                   |                 | shared   | 15                | 3         | 3         |
|     |            |                   |                 | shared   | 16q11.2-16q24.3   | 2 LOH     | 2 LOH     |
|     |            |                   |                 | shared   | 19                | 3         | 3         |
|     |            |                   |                 | unshared | -                 | -         | -         |
|     |            |                   |                 |          |                   |           |           |
| 18  | Baseline   | Iliac crest left  | Ilium right     | shared   | 2                 | 3         | 3         |
|     |            |                   |                 | shared   | 3                 | 3         | 3         |
|     |            |                   |                 | shared   | 4                 | 3         | 3         |
|     |            |                   |                 | shared   | 5                 | 3         | 3         |
|     |            |                   |                 | shared   | 7                 | 3         | 3         |
|     |            |                   |                 | shared   | 9                 | 3         | 3         |
|     |            |                   |                 | shared   | 11p15.5-11p11.12  | 3         | 3         |
|     |            |                   |                 | shared   | 11p11.12-11q25    | 4         | 4         |
|     |            |                   |                 | shared   | 15                | 5         | 5         |
|     |            |                   |                 | shared   | 19                | 4         | 4         |
|     |            |                   |                 | shared   | 20                | 3         | 3         |
|     |            |                   |                 | shared   | 21                | 3         | 3         |
|     |            |                   |                 | unshared | -                 | -         | -         |
|     |            |                   |                 |          |                   |           |           |
| 19  | Baseline   | Iliac crest right | Clavicle right  | shared   | 1q21.1-1q44       | 3         | 3         |
|     |            |                   |                 | shared   | 2p11.2            | 1         | 1         |
|     |            |                   |                 | shared   | 3                 | 3         | 3         |
|     |            |                   |                 | shared   | 5p15.33-5q11.2    | 3         | 3         |
|     |            |                   |                 | shared   | 6p25.3-6p11.2     | 3         | 3         |
|     |            |                   |                 | shared   | 6q13-6q27         | 3         | 3         |
|     |            |                   |                 | shared   | 7p22.3-7q36.3     | 3         | 3         |
|     |            |                   |                 | shared   | 8p23.3-8p12       | 1         | 1         |
|     |            |                   |                 | shared   | 9                 | 3         | 3         |
|     |            |                   |                 | shared   | 11                | 3         | 3         |
|     |            |                   |                 | shared   | 12p13.33-12p11.1  | 1         | 1         |
|     |            |                   |                 | shared   | 13                | 1         | 1         |
|     |            |                   |                 | shared   | 14q11.2-14q32.33  | 2 LOH     | 2 LOH     |
|     |            |                   |                 | shared   | 15                | 3         | 3         |
|     |            |                   |                 | shared   | 18p11.32-18q23    | 3         | 3         |

| PID       | Time point      | RNAS                     | FNAS       | Type                                | Region           | Copy RNAS | Copy FNAS |
|-----------|-----------------|--------------------------|------------|-------------------------------------|------------------|-----------|-----------|
|           |                 |                          |            | shared                              | 19               | 3         | 3         |
|           |                 |                          |            | shared                              | 20p12.1-20q11.21 | 3         | 3         |
|           |                 |                          |            | shared                              | 21               | 2 LOH     | 2 LOH     |
|           |                 |                          |            | shared                              | 22               | 2 LOH     | 2 LOH     |
|           |                 |                          |            | unshared                            | 5q               | 3         | 2 LOH     |
|           |                 |                          |            | unshared                            | 20p13-20p12.1    | 3         | 2         |
|           |                 |                          |            |                                     |                  |           |           |
| <b>20</b> | <b>Baseline</b> | <b>Iliac crest right</b> | <b>T12</b> | shared                              | 3                | 3         | 3         |
|           |                 |                          |            | shared                              | 4p14-4q35.2      | 3         | 3         |
|           |                 |                          |            | shared                              | 5                | 3         | 3         |
|           |                 |                          |            | shared                              | 6p25.3-6q14.1    | 3         | 3         |
|           |                 |                          |            | shared                              | 6q14.2-6q16.1    | 3         | 3         |
|           |                 |                          |            | shared                              | 6q16.1           | 4         | 4         |
|           |                 |                          |            | shared                              | 6q16.1           | 3         | 3         |
|           |                 |                          |            | shared                              | 6q16.3-6q21      | 3         | 3         |
|           |                 |                          |            | shared                              | 6q21-6q22.31     | 4         | 4         |
|           |                 |                          |            | shared                              | 6q22.31          | 3         | 3         |
|           |                 |                          |            | shared                              | 7p22.3-7q11.21   | 3         | 3         |
|           |                 |                          |            | shared                              | 7q11.21-7q36.3   | 3         | 3         |
|           |                 |                          |            | shared                              | 9                | 3         | 3         |
|           |                 |                          |            | shared                              | 11q12.1-11q25    | 3         | 3         |
|           |                 |                          |            | shared                              | 15q11.1-15q23    | 3         | 3         |
|           |                 |                          |            | shared                              | 15q23-15q24.3    | 3         | 3         |
|           |                 |                          |            | shared                              | 15q25.3-15q26.3  | 3         | 3         |
|           |                 |                          |            | shared                              | 17p11.2-17q25.3  | 3         | 3         |
|           |                 |                          |            | shared                              | 19p13.3-19p13.12 | 3         | 3         |
|           |                 |                          |            | shared                              | 19p13.12-19p12   | 4         | 4         |
|           |                 |                          |            | shared                              | 19p12-19q13.43   | 3         | 3         |
|           |                 |                          |            | shared<br>(minor sub-clone in RNAS) | 21               | 3         | 3         |
|           |                 |                          |            | shared                              | 22q11.21-22q13.1 | 1         | 1         |
|           |                 |                          |            | shared                              | 22q13.1          | 3         | 3         |
|           |                 |                          |            | shared                              | 22q13.2-22q13.33 | 1         | 1         |
|           |                 |                          |            | unshared                            | 15q23            | 4         | 3         |
|           |                 |                          |            | unshared                            | 15q24.3-15q25.3  | 4         | 3         |
|           |                 |                          |            | unshared                            | 17p13.3-17p11.2  | 3         | 2         |
|           |                 |                          |            |                                     |                  |           |           |
|           |                 | <b>Iliac crest right</b> | <b>T8</b>  | shared                              | <b>Like T12</b>  |           |           |
|           |                 |                          |            | additional shared                   | 15q23            | 4         | 4         |
|           |                 |                          |            | additional shared                   | 15q24.3-15q25.3  | 4         | 4         |
|           |                 |                          |            | additional shared                   | 17p13.3-17p11.2  | 3         | 3         |

| PID | Time point | RNAS              | FNAS             | Type     | Region          | Copy RNAS | Copy FNAS |
|-----|------------|-------------------|------------------|----------|-----------------|-----------|-----------|
|     |            |                   |                  | unshared | -               | -         | -         |
|     |            | Iliac crest right | Acetabulum right | shared   | Like T12        |           |           |
|     |            |                   |                  | unshared | Like T12        |           |           |
| 21  | Baseline   | Iliac crest left  | L3               | shared   | 1p36.33-1p22.3  | 3         | 3         |
|     |            |                   |                  | shared   | 1p22.3-1p12     | 1         | 1         |
|     |            |                   |                  | shared   | 1q21.1-1q32.3   | 3         | 3         |
|     |            |                   |                  | shared   | 1q42.2-1q42.3   | 3         | 3         |
|     |            |                   |                  | shared   | 2p25.3-2p23.3   | 1         | 1         |
|     |            |                   |                  | shared   | 2p23.3-2p22.2   | 3         | 3         |
|     |            |                   |                  | shared   | 2p16.3          | 3         | 3         |
|     |            |                   |                  | shared   | 8p21.1-8p11.22  | 1         | 1         |
|     |            |                   |                  | shared   | 11q13.1-11q13.2 | 3         | 3         |
|     |            |                   |                  | shared   | 11q13.3-11q25   | 3         | 3         |
|     |            |                   |                  | shared   | 13              | 1         | 1         |
|     |            |                   |                  | shared   | 14q32.33        | 1         | 1         |
|     |            |                   |                  | shared   | 17q12           | 3         | 3         |
|     |            |                   |                  | shared   | 22              | 1         | 1         |
|     |            |                   |                  | unshared | -               | -         | -         |
| 22  | Baseline   | Iliac crest left  | L5               | shared   | 1p36.33-1p11.2  | 2 LOH     | 2 LOH     |
|     |            |                   |                  | shared   | 9q12-9q34.3     | 2 LOH     | 2 LOH     |
|     |            |                   |                  | shared   | 13              | 1         | 1         |
|     |            |                   |                  | unshared | -               | -         | -         |
| 23  | Baseline   | Iliac crest left  | Sacrum right     | shared   | 3p11.1-3q29     | 3         | 3         |
|     |            |                   |                  | shared   | 6p25.3-6p27     | 4         | 4         |
|     |            |                   |                  | shared   | 9p24.3-9q34.3   | 3         | 3         |
|     |            |                   |                  | shared   | 11p15.5-11q25   | 3         | 3         |
|     |            |                   |                  | shared   | 15q11.1-15q26.3 | 3         | 3         |
|     |            |                   |                  | shared   | 19p13.3-19p11   | 3         | 3         |
|     |            |                   |                  | shared   | 20q11.22        | 1         | 1         |
|     |            |                   |                  | shared   | 21p11.2-21q22.3 | 3         | 3         |
|     |            |                   |                  | shared   | 22q11.1         | 3         | 3         |
|     |            |                   |                  | unshared | -               | -         | -         |
| 24  | Baseline   | Iliac crest right | T7               | shared   | 3p22.3-3p22.2   | 1         | 1         |
|     |            |                   |                  | shared   | 3p22.2-3q29     | 3         | 3         |
|     |            |                   |                  | shared   | 5               | 3         | 3         |
|     |            |                   |                  | shared   | 6p24.3-6p12.3   | 4         | 4         |
|     |            |                   |                  | shared   | 6p12.3-6q22.32  | 3         | 3         |
|     |            |                   |                  | shared   | 6q22.32-6q27    | 2 LOH     | 2 LOH     |
|     |            |                   |                  | shared   | 7               | 3         | 3         |
|     |            |                   |                  | shared   | 8p22-8p11.21    | 1         | 1         |

| PID       | Time point      | RNAS                    | FNAS               | Type     | Region            | Copy RNAS | Copy FNAS |
|-----------|-----------------|-------------------------|--------------------|----------|-------------------|-----------|-----------|
|           |                 |                         |                    | shared   | 8q24.21-8q24.3    | 3         | 3         |
|           |                 |                         |                    | shared   | 9p24.3-9p11.2     | 4         | 4         |
|           |                 |                         |                    | shared   | 9q12-9q34.3       | 3         | 3         |
|           |                 |                         |                    | shared   | 13                | 1         | 1         |
|           |                 |                         |                    | shared   | 15                | 4         | 4         |
|           |                 |                         |                    | shared   | 19                | 3         | 3         |
|           |                 |                         |                    | shared   | 21                | 3         | 3         |
|           |                 |                         |                    | unshared | 1q                | 3         | 4         |
|           |                 |                         |                    |          |                   |           |           |
| <b>25</b> | <b>Baseline</b> | <b>Iliac crest left</b> | <b>T8</b>          | shared   | 5                 | 3         | 3         |
|           |                 |                         |                    | shared   | 6p25.3-6q16.2     | 3         | 3         |
|           |                 |                         |                    | shared   | 7                 | 3         | 3         |
|           |                 |                         |                    | shared   | 9                 | 3         | 3         |
|           |                 |                         |                    | shared   | 15                | 3         | 3         |
|           |                 |                         |                    | shared   | 19                | 3         | 3         |
|           |                 |                         |                    | shared   | 21q22.12-21q22.3  | 1         | 1         |
|           |                 |                         |                    | unshared | -                 | -         | -         |
|           |                 |                         |                    |          |                   |           |           |
|           |                 | <b>Iliac crest left</b> | <b>L2</b>          | shared   | <b>Like T8</b>    |           |           |
|           |                 |                         |                    | unshared | -                 | -         | -         |
|           |                 |                         |                    |          |                   |           |           |
|           |                 | <b>Iliac crest left</b> | <b>L3</b>          | shared   | <b>Like T8</b>    |           |           |
|           |                 |                         |                    | unshared | -                 | -         | -         |
|           |                 |                         |                    |          |                   |           |           |
| <b>26</b> | <b>Baseline</b> | <b>Iliac crest left</b> | <b>Sacrum left</b> | shared   | 5                 | 3         | 3         |
|           |                 |                         |                    | shared   | 6p25.3-6p21.1     | 3         | 3         |
|           |                 |                         |                    | shared   | 6p21.1-6q27       | 1         | 1         |
|           |                 |                         |                    | shared   | 11                | 3         | 3         |
|           |                 |                         |                    | shared   | 13                | 1         | 1         |
|           |                 |                         |                    | shared   | 14q11.2-14q32.33  | 2 LOH     | 2 LOH     |
|           |                 |                         |                    | shared   | 14q32.33-14q32.33 | 0         | 0         |
|           |                 |                         |                    | shared   | 15                | 3         | 3         |
|           |                 |                         |                    | shared   | 19                | 3         | 3         |
|           |                 |                         |                    | shared   | 21                | 3         | 3         |
|           |                 |                         |                    | unshared | -                 | -         | -         |
|           |                 |                         |                    |          |                   |           |           |
| <b>27</b> | <b>Baseline</b> | <b>Iliac crest left</b> | <b>L1</b>          | shared   | 1q21.1-1q32.2     | 3         | 3         |
|           |                 |                         |                    | shared   | 1q43-1q44         | 3         | 3         |
|           |                 |                         |                    | shared   | 3                 | 3         | 3         |
|           |                 |                         |                    | shared   | 5                 | 3         | 3         |
|           |                 |                         |                    | shared   | 7                 | 3         | 3         |
|           |                 |                         |                    | shared   | 8q24.13-8q24.21   | 1         | 1         |
|           |                 |                         |                    | shared   | 9                 | 3         | 3         |
|           |                 |                         |                    | shared   | 14                | 3         | 3         |
|           |                 |                         |                    | shared   | 15                | 3         | 3         |
|           |                 |                         |                    | shared   | 19p13.3-19p13.11  | 4         | 4         |





| PID      | Time point        | RNAS              | FNAS                             | Type     | Region          | Copy RNAS        | Copy FNAS  |          |                 |   |   |
|----------|-------------------|-------------------|----------------------------------|----------|-----------------|------------------|------------|----------|-----------------|---|---|
| 30       | Baseline          | Iliac crest left  | Anterior end of right second rib | shared   | 1p33-1p31.3     | 1                | 1          |          |                 |   |   |
|          |                   |                   |                                  | shared   | 1p31.1-1p31.1   | 1                | 1          |          |                 |   |   |
|          |                   |                   |                                  | shared   | 1p31.1-1p12     | 1                | 1          |          |                 |   |   |
|          |                   |                   |                                  | shared   | 1q12-1q44       | 3                | 3          |          |                 |   |   |
|          |                   |                   |                                  | shared   | 3               | 3                | 3          |          |                 |   |   |
|          |                   |                   |                                  | shared   | 6q24.3-6q27     | 1                | 1          |          |                 |   |   |
|          |                   |                   |                                  | shared   | 7               | 3                | 3          |          |                 |   |   |
|          |                   |                   |                                  | shared   | 13              | 1                | 1          |          |                 |   |   |
|          |                   |                   |                                  | shared   | 15              | 3                | 3          |          |                 |   |   |
|          |                   |                   |                                  | shared   | 16p11.2-16q24.3 | 1                | 1          |          |                 |   |   |
|          |                   |                   |                                  | shared   | 20q13.2-20q13.2 | 1                | 1          |          |                 |   |   |
|          |                   |                   |                                  | shared   | 21              | 4                | 4          |          |                 |   |   |
|          |                   |                   |                                  | unshared | 8               | 2                | 3          |          |                 |   |   |
|          |                   |                   |                                  |          |                 |                  |            |          |                 |   |   |
|          |                   |                   |                                  | 31       | Baseline        | Iliac crest left | Ilium left | shared   | 1p36.11-1p35.3  | 1 | 1 |
| shared   | 1p35.2-1p35.1     | 1                 | 1                                |          |                 |                  |            |          |                 |   |   |
| shared   | 1p33-1p32.1       | 1                 | 1                                |          |                 |                  |            |          |                 |   |   |
| shared   | 1p31.1-1p12       | 1                 | 1                                |          |                 |                  |            |          |                 |   |   |
| shared   | 2q24.1-2q24.3     | 1                 | 1                                |          |                 |                  |            |          |                 |   |   |
| shared   | 3p26.3-3p12.2     | 1                 | 1                                |          |                 |                  |            |          |                 |   |   |
| shared   | 3p12.1-3p11.1     | 1                 | 1                                |          |                 |                  |            |          |                 |   |   |
| shared   | 4q34.3            | 1                 | 1                                |          |                 |                  |            |          |                 |   |   |
| shared   | 4q35.2            | 3                 | 3                                |          |                 |                  |            |          |                 |   |   |
| shared   | 6q22.33-6q27      | 1                 | 1                                |          |                 |                  |            |          |                 |   |   |
| shared   | 7                 | 3                 | 3                                |          |                 |                  |            |          |                 |   |   |
| shared   | 12q13.11-12q13.12 | 1                 | 1                                |          |                 |                  |            |          |                 |   |   |
| shared   | 12q13.13-12q13.3  | 1                 | 1                                |          |                 |                  |            |          |                 |   |   |
| shared   | 12q14.1-12q24.33  | 1                 | 1                                |          |                 |                  |            |          |                 |   |   |
| shared   | 15                | 3                 | 3                                |          |                 |                  |            |          |                 |   |   |
| shared   | 17p12             | 1                 | 1                                |          |                 |                  |            |          |                 |   |   |
| shared   | 19p13.3-19q13.43  | 3                 | 3                                |          |                 |                  |            |          |                 |   |   |
| unshared | -                 | -                 | -                                |          |                 |                  |            |          |                 |   |   |
|          |                   |                   |                                  |          |                 |                  |            |          |                 |   |   |
|          |                   | Iliac crest left  | T10                              |          |                 |                  |            | shared   | Like ilium left |   |   |
|          |                   |                   |                                  |          |                 |                  |            | unshared | -               | - | - |
|          |                   |                   |                                  |          |                 |                  |            |          |                 |   |   |
|          |                   | Iliac crest left  | L1                               |          |                 |                  |            | shared   | Like ilium left |   |   |
|          |                   |                   |                                  | unshared | -               | -                | -          |          |                 |   |   |
|          |                   |                   |                                  |          |                 |                  |            |          |                 |   |   |
| 32       | Baseline          | Iliac crest right | Sacrum left                      | shared   | 1q21.1-1q44     | 3                | 3          |          |                 |   |   |
|          |                   |                   |                                  | shared   | 8p23.3-8p22     | 1                | 1          |          |                 |   |   |
|          |                   |                   |                                  | shared   | 8p21.3-8p12     | 1                | 1          |          |                 |   |   |
|          |                   |                   |                                  | shared   | 8p12            | 1                | 1          |          |                 |   |   |
|          |                   |                   |                                  | shared   | 11q13.3-11q13.4 | 3                | 3          |          |                 |   |   |

| PID       | Time point      | RNAS                     | FNAS                 | Type     | Region                  | Copy RNAS | Copy FNAS |
|-----------|-----------------|--------------------------|----------------------|----------|-------------------------|-----------|-----------|
|           |                 |                          |                      | shared   | 13q12.13-13q21.32       | 1         | 1         |
|           |                 |                          |                      | shared   | 15q26.2-15q26.3         | 1         | 1         |
|           |                 |                          |                      | shared   | 16q11.2-16q24.3         | 1         | 1         |
|           |                 |                          |                      | shared   | 17q21.31-17q25.3        | 3         | 3         |
|           |                 |                          |                      | unshared | -                       | -         | -         |
|           |                 |                          |                      |          |                         |           |           |
|           | <b>Treated</b>  | <b>Iliac crest right</b> | <b>Sacrum right</b>  | shared   | <b>Like at baseline</b> |           |           |
|           |                 |                          |                      | unshared | -                       |           |           |
|           |                 |                          |                      |          |                         |           |           |
| <b>33</b> | <b>Baseline</b> | <b>Iliac crest right</b> | <b>Sacrum right</b>  | shared   | 2p22.3                  | 3         | 3         |
|           |                 |                          |                      | shared   | 3p26.3-3p14.3           | 3         | 3         |
|           |                 |                          |                      | shared   | 3p14.3                  | 4         | 4         |
|           |                 |                          |                      | shared   | 3p14.3-3q29             | 3         | 3         |
|           |                 |                          |                      | shared   | 4                       | 2 LOH     | 2 LOH     |
|           |                 |                          |                      | shared   | 5                       | 3         | 3         |
|           |                 |                          |                      | shared   | 9                       | 3         | 3         |
|           |                 |                          |                      | shared   | 11p15.5-11q14.2         | 3         | 3         |
|           |                 |                          |                      | shared   | 11q14.2-11q25           | 3         | 3         |
|           |                 |                          |                      | shared   | 13                      | 1         | 1         |
|           |                 |                          |                      | shared   | 15q11.1-15q21.2         | 4         | 4         |
|           |                 |                          |                      | shared   | 15q21.3-15q26.3         | 4         | 4         |
|           |                 |                          |                      | shared   | 16p12.2-16p11.2         | 3         | 3         |
|           |                 |                          |                      | shared   | 17q23.3-17q25.3         | 1         | 1         |
|           |                 |                          |                      | shared   | 19p13.3-19q13.2         | 4         | 4         |
|           |                 |                          |                      | shared   | 19q13.2-19q13.43        | 3         | 3         |
|           |                 |                          |                      | shared   | 20q11.21-20q13.12       | 1         | 1         |
|           |                 |                          |                      | unshared | -                       | -         | -         |
|           |                 |                          |                      |          |                         |           |           |
| <b>34</b> | <b>Baseline</b> | <b>Iliac crest right</b> | <b>Pleural fluid</b> | shared   | 1p32.3-1p11.2           | 1         | 1         |
|           |                 |                          |                      | shared   | 1q21.1-1q23.1           | 4         | 4         |
|           |                 |                          |                      | shared   | 1q23.1-1q44             | 3         | 3         |
|           |                 |                          |                      | shared   | 2q23.3                  | 1         | 1         |
|           |                 |                          |                      | shared   | 2q24.3                  | 1         | 1         |
|           |                 |                          |                      | shared   | 3p26.3-3p14.2           | 1         | 1         |
|           |                 |                          |                      | shared   | 4p16.3                  | 1         | 1         |
|           |                 |                          |                      | shared   | 6q25.1-6q26             | 1         | 1         |
|           |                 |                          |                      | shared   | 7p22.3-7p14.3           | 3         | 3         |
|           |                 |                          |                      | shared   | 7q11.21-7q36.3          | 3         | 3         |
|           |                 |                          |                      | shared   | 10q11.22                | 3         | 3         |
|           |                 |                          |                      | shared   | 11                      | 2 LOH     | 2 LOH     |
|           |                 |                          |                      | shared   | 13                      | 1         | 1         |
|           |                 |                          |                      | shared   | 14                      | 1         | 1         |
|           |                 |                          |                      | shared   | 17p13.2-17p12           | 1         | 1         |
|           |                 |                          |                      | shared   | 19p13.3                 | 2 LOH     | 2 LOH     |



| PID       | Time point      | RNAS                     | FNAS                              | Type     | Region                                 | Copy RNAS | Copy FNAS |
|-----------|-----------------|--------------------------|-----------------------------------|----------|----------------------------------------|-----------|-----------|
|           |                 |                          |                                   | shared   | 19p13.3-19p13.2                        | 3         | 3         |
|           |                 |                          |                                   | shared   | 20p13-20p11.1                          | 1         | 1         |
|           |                 |                          |                                   | shared   | 21p11.2-21q22.3                        | 3         | 3         |
|           |                 |                          |                                   | shared   | 22q12.2-22q13.33                       | 1         | 1         |
|           |                 |                          |                                   | unshared | -                                      | -         | -         |
|           |                 |                          |                                   |          |                                        |           |           |
| <b>35</b> | <b>Baseline</b> | <b>Iliac crest left</b>  | <b>Posterior iliac wing right</b> | shared   | 3                                      | 3         | 3         |
|           |                 |                          |                                   | shared   | 5                                      | 4         | 4         |
|           |                 |                          |                                   | shared   | 7p22.3-7q21.3                          | 3         | 3         |
|           |                 |                          |                                   | shared   | 7q21.3-7q36.3                          | 4         | 4         |
|           |                 |                          |                                   | shared   | 8p23.3-8p11.21                         | 1         | 1         |
|           |                 |                          |                                   | shared   | 9                                      | 4         | 4         |
|           |                 |                          |                                   | shared   | 11                                     | 3         | 3         |
|           |                 |                          |                                   | shared   | 14q24.2-14q32.33                       | 1         | 1         |
|           |                 |                          |                                   | shared   | 15                                     | 4         | 4         |
|           |                 |                          |                                   | shared   | 19                                     | 3         | 3         |
|           |                 |                          |                                   | shared   | 21                                     | 3         | 3         |
|           |                 |                          |                                   | unshared | -                                      | -         | -         |
|           |                 |                          |                                   |          |                                        |           |           |
|           |                 | <b>Iliac crest left</b>  | <b>Upper sacrum right</b>         | shared   | <b>Like posterior iliac wing right</b> |           |           |
|           |                 |                          |                                   | unshared | -                                      | -         | -         |
|           |                 |                          |                                   |          |                                        |           |           |
| <b>36</b> | <b>Baseline</b> | <b>Iliac crest right</b> | <b>Iliac wing left</b>            | shared   | 8p23.3-8p12                            | 1         | 1         |
|           |                 |                          |                                   | shared   | 15q11.1-15q11.2                        | 2 LOH     | 2 LOH     |
|           |                 |                          |                                   | shared   | 17q21.31-17q25.3                       | 3         | 3         |
|           |                 |                          |                                   | unshared | -                                      | -         | -         |
|           |                 |                          |                                   |          |                                        |           |           |
| <b>37</b> | <b>Baseline</b> | <b>Iliac crest left</b>  | <b>Anterior ilium left</b>        | shared   | 5                                      | 3         | 3         |
|           |                 |                          |                                   | shared   | 9                                      | 3         | 3         |
|           |                 |                          |                                   | shared   | 11                                     | 3         | 3         |
|           |                 |                          |                                   | shared   | 15                                     | 3         | 3         |
|           |                 |                          |                                   | shared   | 19                                     | 3         | 3         |
|           |                 |                          |                                   | unshared | -                                      | -         | -         |
|           |                 |                          |                                   |          |                                        |           |           |
| <b>38</b> | <b>Baseline</b> | <b>Iliac crest right</b> | <b>Sacrum right</b>               | shared   | 3p14.2                                 | 3         | 3         |
|           |                 |                          |                                   | shared   | 9p13.3-9p13.2                          | 3         | 3         |
|           |                 |                          |                                   | shared   | 9q22.32-9q22.33                        | 1         | 1         |
|           |                 |                          |                                   | shared   | 9q33.3-9q34.11                         | 1         | 1         |
|           |                 |                          |                                   | shared   | 11q13.1                                | 3         | 3         |
|           |                 |                          |                                   | shared   | 13q11-13q12.12                         | 1         | 1         |
|           |                 |                          |                                   | shared   | 13q14.13                               | 1         | 1         |
|           |                 |                          |                                   | shared   | 13q32.1-13q32.2                        | 1         | 1         |
|           |                 |                          |                                   | shared   | 19p13.2-19p13.12                       | 3         | 3         |

| PID       | Time point      | RNAS                     | FNAS                         | Type     | Region            | Copy RNAS | Copy FNAS |
|-----------|-----------------|--------------------------|------------------------------|----------|-------------------|-----------|-----------|
|           |                 |                          |                              | shared   | 22q11.1-22q11.21  | 3         | 3         |
|           |                 |                          |                              | unshared | -                 | -         | -         |
| <b>39</b> | <b>Baseline</b> | <b>Iliac crest right</b> | <b>Sacrum right</b>          | shared   | 1p31.1-1p13.1     | 1         | 1         |
|           |                 |                          |                              | shared   | 7q31.1-7q36.3     | 3         | 3         |
|           |                 |                          |                              | shared   | 8p23.3-8p21.2     | 1         | 1         |
|           |                 |                          |                              | shared   | 11q13.3-11q13.5   | 3         | 3         |
|           |                 |                          |                              | shared   | 11q13.5-11q22.1   | 1         | 1         |
|           |                 |                          |                              | shared   | 11q22.1-11q22.2   | 0         | 0         |
|           |                 |                          |                              | shared   | 11q22.3-11q23.2   | 1         | 1         |
|           |                 |                          |                              | shared   | 11q23.2-11q23.3   | 0         | 0         |
|           |                 |                          |                              | shared   | 11q23.3           | 1         | 1         |
|           |                 |                          |                              | shared   | 11q23.3           | 3         | 3         |
|           |                 |                          |                              | shared   | 11q23.3-11q24.1   | 1         | 1         |
|           |                 |                          |                              | shared   | 11q24.1-11q25     | 3         | 3         |
|           |                 |                          |                              | shared   | 12p13.33-12p12.3  | 1         | 1         |
|           |                 |                          |                              | shared   | 13q14.12-13q21.33 | 1         | 1         |
|           |                 |                          |                              | shared   | 14q31.3-14q32.33  | 3         | 3         |
|           |                 |                          |                              | shared   | 16                | 1         | 1         |
|           |                 |                          |                              | shared   | 20p13-20p12.1     | 1         | 1         |
|           |                 |                          |                              | shared   | 22                | 1         | 1         |
|           |                 |                          |                              | unshared | -                 | -         | -         |
| <b>40</b> | <b>Baseline</b> | <b>Iliac crest right</b> | <b>Ilium right</b>           | shared   | 1p36.33-1p11.2    | 1         | 1         |
|           |                 |                          |                              | shared   | 2                 | 1         | 1         |
|           |                 |                          |                              | shared   | 4                 | 1         | 1         |
|           |                 |                          |                              | shared   | 13                | 1         | 1         |
|           |                 |                          |                              | shared   | 22                | 1         | 1         |
|           |                 |                          |                              | unshared | -                 | -         | -         |
| <b>41</b> | <b>Baseline</b> | <b>Iliac crest left</b>  | <b>T8</b>                    | shared   | 3                 | 3         | 3         |
|           |                 |                          |                              | shared   | 5                 | 3         | 3         |
|           |                 |                          |                              | shared   | 8                 | 2 LOH     | 2 LOH     |
|           |                 |                          |                              | shared   | 9                 | 4         | 4         |
|           |                 |                          |                              | shared   | 11                | 3         | 3         |
|           |                 |                          |                              | shared   | 12q24.22-12q24.33 | 2 LOH     | 2 LOH     |
|           |                 |                          |                              | shared   | 15                | 3         | 3         |
|           |                 |                          |                              | shared   | 18                | 2 LOH     | 2 LOH     |
|           |                 |                          |                              | shared   | 19                | 3         | 3         |
|           |                 |                          |                              | unshared | -                 | -         | -         |
| <b>42</b> | <b>Baseline</b> | <b>Iliac crest left</b>  | <b>Posterior ilium right</b> | shared   | 1p36.33-1p11.2    | 2 LOH     | 2 LOH     |
|           |                 |                          |                              | shared   | 1q21.1-1q44       | 3 LOH     | 3 LOH     |
|           |                 |                          |                              | shared   | 2                 | 3         | 3         |

| PID | Time point | RNAS              | FNAS         | Type     | Region            | Copy RNAS | Copy FNAS |
|-----|------------|-------------------|--------------|----------|-------------------|-----------|-----------|
|     |            |                   |              | shared   | 3                 | 3         | 3         |
|     |            |                   |              | shared   | 4                 | 3         | 3         |
|     |            |                   |              | shared   | 5p15.33-5p14.3    | 3         | 3         |
|     |            |                   |              | shared   | 5p14.3-5p13.3     | 4         | 4         |
|     |            |                   |              | shared   | 5p13.3            | 3         | 3         |
|     |            |                   |              | shared   | 5p13.3-5p13.2     | 4         | 4         |
|     |            |                   |              | shared   | 5p13.2-5p13.1     | 5         | 5         |
|     |            |                   |              | shared   | 5p13.1-5q35.3     | 4         | 4         |
|     |            |                   |              | shared   | 6                 | 3         | 3         |
|     |            |                   |              | shared   | 7                 | 3         | 3         |
|     |            |                   |              | shared   | 8                 | 3         | 3         |
|     |            |                   |              | shared   | 9                 | 3         | 3         |
|     |            |                   |              | shared   | 10                | 3         | 3         |
|     |            |                   |              | shared   | 11p15.5-11q23.3   | 3         | 3         |
|     |            |                   |              | shared   | 11q23.3-11q25     | 4         | 4         |
|     |            |                   |              | shared   | 15                | 4         | 4         |
|     |            |                   |              | shared   | 16p13.3-16p11.1   | 2 LOH     | 2 LOH     |
|     |            |                   |              | shared   | 16q11.2-16q24.3   | 1         | 1         |
|     |            |                   |              | shared   | 17                | 3         | 3         |
|     |            |                   |              | shared   | 19                | 4         | 4         |
|     |            |                   |              | shared   | 20p13-20q11.21    | 4         | 4         |
|     |            |                   |              | shared   | 20q11.21-20q13.33 | 3         | 3         |
|     |            |                   |              | shared   | 21                | 3         | 3         |
|     |            |                   |              | unshared | -                 | -         | -         |
|     |            |                   |              |          |                   |           |           |
| 43  | Treated    | Iliac crest right | Sacrum right | shared   | 1p36.33-1p34.3    | 3         | 3         |
|     |            |                   |              | shared   | 2p25.3-2q12.1     | 4         | 4         |
|     |            |                   |              | shared   | 3p26.3-3q11.2     | 4         | 4         |
|     |            |                   |              | shared   | 3q11.2-3q29       | 3         | 3         |
|     |            |                   |              | shared   | 4p16.3-4q12       | 4         | 4         |
|     |            |                   |              | shared   | 4q13.3-4q31.1     | 4         | 4         |
|     |            |                   |              | shared   | 4q31.1-4q32.1     | 2 LOH     | 2 LOH     |
|     |            |                   |              | shared   | 4q32.1-4q35.2     | 4         | 4         |
|     |            |                   |              | shared   | 6p25.3-6q21       | 4         | 4         |
|     |            |                   |              | shared   | 6q21-6q27         | 2 LOH     | 2 LOH     |
|     |            |                   |              | shared   | 8p23.3-8p12       | 1         | 1         |
|     |            |                   |              | shared   | 9p24.3-9q34.3     | 4         | 4         |
|     |            |                   |              | shared   | 11q22.1-11q22.3   | 4         | 4         |
|     |            |                   |              | shared   | 11q22.3-11q25     | 4         | 4         |
|     |            |                   |              | shared   | 12                | 2 LOH     | 2 LOH     |
|     |            |                   |              | shared   | 13                | 2 LOH     | 2 LOH     |
|     |            |                   |              | shared   | 16p13.3-16p13.2   | 3         | 3         |
|     |            |                   |              | shared   | 16q11.2-16q24.3   | 2 LOH     | 2 LOH     |
|     |            |                   |              | shared   | 17q11.2-17q12     | 3         | 3         |
|     |            |                   |              | shared   | 17q12-17q21.31    | 2 LOH     | 2 LOH     |

| PID | Time point | RNAS                     | FNAS      | Type              | Region                   | Copy RNAS | Copy FNAS |
|-----|------------|--------------------------|-----------|-------------------|--------------------------|-----------|-----------|
|     |            |                          |           | shared            | 18                       | 4         | 4         |
|     |            |                          |           | shared            | 21                       | 4         | 4         |
|     |            |                          |           | shared            | 22                       | 2 LOH     | 2 LOH     |
|     |            |                          |           | unshared          | 1p34.3-1q44              | 5         | 4         |
|     |            |                          |           | unshared          | 2q12.1-2q34              | 4         | 3         |
|     |            |                          |           | unshared          | 2q34-2q37.3              | 4         | 2         |
|     |            |                          |           | unshared          | 4q12-4q13.2              | 4         | 3         |
|     |            |                          |           | unshared          | 5                        | 4         | 3         |
|     |            |                          |           | unshared          | 7p                       | 3 LOH     | 2 LOH     |
|     |            |                          |           | unshared          | 7q                       | 5         | 3         |
|     |            |                          |           | unshared          | 8p12-8q24.3              | 4         | 3         |
|     |            |                          |           | unshared          | 10                       | 4         | 3         |
|     |            |                          |           | unshared          | 11p13-11p15.5            | 4         | 3         |
|     |            |                          |           | unshared          | 11q11-11q22.1            | 4         | 3         |
|     |            |                          |           | unshared          | 14                       | 4         | 3         |
|     |            |                          |           | unshared          | 15                       | 4         | 3         |
|     |            |                          |           | unshared          | 16p11.1-16p13.2          | 4         | 3         |
|     |            |                          |           | unshared          | 17p13.3-17q11.2          | 3         | 4         |
|     |            |                          |           | unshared          | 17q21.31-17q25.2         | 5         | 4         |
|     |            |                          |           | unshared          | 17q25.3                  | 5         | 3         |
|     |            |                          |           | unshared          | 19                       | 5         | 4         |
|     |            |                          |           | unshared          | 20p13-20p12.3            | 2 LOH     | 1         |
|     |            |                          |           | unshared          | 20p12.3-20p11.21         | 2 LOH     | 3 LOH     |
|     |            |                          |           | unshared          | 20p11.21-20q11.23        | 4         | 5         |
|     |            |                          |           | unshared          | 20q11.23-20q13.33        | 4         | 3         |
|     |            |                          |           |                   |                          |           |           |
|     |            | <b>Iliac crest right</b> | <b>T9</b> | shared            | <b>Like sacrum right</b> |           |           |
|     |            |                          |           | additional shared | 19p13.11-19q13.43        | 5         | 5         |
|     |            |                          |           | unshared          | 1p34.3-q44               | 5         | 4         |
|     |            |                          |           | unshared          | 2q12.1-q34               | 4         | 3         |
|     |            |                          |           | unshared          | 2q34-q37.3               | 4         | 2         |
|     |            |                          |           | unshared          | 4q12-q13.2               | 4         | 3         |
|     |            |                          |           | unshared          | 5                        | 4         | 3         |
|     |            |                          |           | unshared          | 7p                       | 3 LOH     | 2 LOH     |
|     |            |                          |           | unshared          | 7q                       | 5         | 3         |
|     |            |                          |           | unshared          | 8p12-q24.3               | 4         | 3         |
|     |            |                          |           | unshared          | 10                       | 4         | 3         |
|     |            |                          |           | unshared          | 11p13-p15.5              | 4         | 3         |
|     |            |                          |           | unshared          | 11q11-q22.1              | 4         | 3         |
|     |            |                          |           | unshared          | 14                       | 4         | 3         |
|     |            |                          |           | unshared          | 15                       | 4         | 3         |
|     |            |                          |           | unshared          | 16p11.1-p13.2            | 4         | 3         |
|     |            |                          |           | unshared          | 17p13.3-q11.2            | 3         | 4         |
|     |            |                          |           | unshared          | 17q21.31-q25.2           | 5         | 4         |
|     |            |                          |           | unshared          | 17q25.3                  | 5         | 3         |

| PID       | Time point     | RNAS                     | FNAS                | Type     | Region            | Copy RNAS | Copy FNAS |
|-----------|----------------|--------------------------|---------------------|----------|-------------------|-----------|-----------|
|           |                |                          |                     | unshared | 19p13.3-19p13.11  | 5         | 4         |
|           |                |                          |                     | unshared | 20p13-20p12.3     | 2 LOH     | 1         |
|           |                |                          |                     | unshared | 20p12.3           | 2 LOH     | 3 LOH     |
|           |                |                          |                     | unshared | 20p12.3-20p12.1   | 2 LOH     | 4 LOH     |
|           |                |                          |                     | unshared | 20p12.1-20p11.21  | 2 LOH     | 3 LOH     |
|           |                |                          |                     | unshared | 20p11.21-q11.23   | 4         | 5         |
|           |                |                          |                     | unshared | 20q11.23-q13.33   | 4         | 3         |
|           |                |                          |                     |          |                   |           |           |
| <b>44</b> | <b>Treated</b> | <b>Iliac crest right</b> | <b>Sacrum right</b> | shared   | 1p33-1p31.1       | 1         | 1         |
|           |                |                          |                     | shared   | 1p31.1-1p12       | 1         | 1         |
|           |                |                          |                     | shared   | 3p14.3-3q26.1     | 3         | 3         |
|           |                |                          |                     | shared   | 4q23-4q35.2       | 2 LOH     | 2 LOH     |
|           |                |                          |                     | shared   | 5p15.33-5q23.1    | 3         | 3         |
|           |                |                          |                     | shared   | 6q23.3-6q27       | 1         | 1         |
|           |                |                          |                     | shared   | 8p22              | 1         | 1         |
|           |                |                          |                     | shared   | 8p21.2-8p11.1     | 1         | 1         |
|           |                |                          |                     | shared   | 9                 | 3         | 3         |
|           |                |                          |                     | shared   | 11p15.5-11p12     | 3         | 3         |
|           |                |                          |                     | shared   | 11p12-11p11.2     | 2 LOH     | 2 LOH     |
|           |                |                          |                     | shared   | 11p11.12-11q25    | 3         | 3         |
|           |                |                          |                     | shared   | 15q11.1-15q24.3   | 4         | 4         |
|           |                |                          |                     | shared   | 15q25.1-15q26.3   | 4         | 4         |
|           |                |                          |                     | shared   | 19p13.3-19q13.12  | 3         | 3         |
|           |                |                          |                     | unshared | 3p26.3-3p14.3     | 3         | 2         |
|           |                |                          |                     | unshared | 3q26.1-3q26.31    | 3         | 2         |
|           |                |                          |                     | unshared | 4p16.3-4q23       | 2 LOH     | 1         |
|           |                |                          |                     | unshared | 5q23.1-5q35.3     | 3         | 2         |
|           |                |                          |                     | unshared | 10p12.2-10p12.1   | 2         | 1         |
|           |                |                          |                     | unshared | 10q11.23-10q22.1  | 2         | 1         |
|           |                |                          |                     | unshared | 10q22.3-10q23.1   | 2         | 1         |
|           |                |                          |                     | unshared | 19q13.12-19q13.43 | 3         | 2         |
|           |                |                          |                     |          |                   |           |           |
| <b>45</b> | <b>Treated</b> | <b>T3</b>                | <b>T3</b>           | shared   | 1p36.33-1p13.2    | 3         | 3         |
|           |                |                          |                     | shared   | 1p13.2-1p12       | 2 LOH     | 2 LOH     |
|           |                |                          |                     | shared   | 1p12-1q44         | 3         | 3         |
|           |                |                          |                     | shared   | 2q36.1-2q37.3     | 1         | 1         |
|           |                |                          |                     | shared   | 3p26.3-3p13       | 3         | 3         |
|           |                |                          |                     | shared   | 3p13-3p12.3       | 3         | 3         |
|           |                |                          |                     | shared   | 3p12.3-3q29       | 3         | 3         |
|           |                |                          |                     | shared   | 4q13.1-4q22.3     | 1         | 1         |
|           |                |                          |                     | shared   | 5p15.33-5p15.31   | 5         | 5         |
|           |                |                          |                     | shared   | 5p15.31-5p15.2    | 3         | 3         |
|           |                |                          |                     | shared   | 5p15.2-5p11       | 5         | 5         |
|           |                |                          |                     | shared   | 5q11.1-5q11.2     | 3         | 3         |
|           |                |                          |                     | shared   | 5q11.2-5q35.3     | 2 LOH     | 2 LOH     |

| PID       | Time point     | RNAS                    | FNAS      | Type     | Region            | Copy RNAS | Copy FNAS |
|-----------|----------------|-------------------------|-----------|----------|-------------------|-----------|-----------|
|           |                |                         |           | shared   | 6q23.3-6q27       | 1         | 1         |
|           |                |                         |           | shared   | 7p22.3-7p21.1     | 1         | 1         |
|           |                |                         |           | shared   | 7p21.1-7q11.21    | 3         | 3         |
|           |                |                         |           | shared   | 7q11.21-7q22.1    | 4         | 4         |
|           |                |                         |           | shared   | 7q22.1-7q36.3     | 5         | 5         |
|           |                |                         |           | shared   | 8p23.3-8q24.3     | 4         | 4         |
|           |                |                         |           | shared   | 9p24.3-9q22.32    | 3         | 3         |
|           |                |                         |           | shared   | 9q22.32-9q34.3    | 3         | 3         |
|           |                |                         |           | shared   | 10q11.22          | 3         | 3         |
|           |                |                         |           | shared   | 11p15.5-11p12     | 3         | 3         |
|           |                |                         |           | shared   | 11p12-11p11.12    | 2 LOH     | 2 LOH     |
|           |                |                         |           | shared   | 11p11.12-11q25    | 3         | 3         |
|           |                |                         |           | shared   | 12p13.31-12p13.2  | 1         | 1         |
|           |                |                         |           | shared   | 15                | 3         | 3         |
|           |                |                         |           | shared   | 16q12.1-16q12.2   | 0         | 0         |
|           |                |                         |           | shared   | 16q12.2           | 1         | 1         |
|           |                |                         |           | shared   | 17p13.1           | 1         | 1         |
|           |                |                         |           | shared   | 18                | 3         | 3         |
|           |                |                         |           | shared   | 19p13.3-19p13.42  | 3         | 3         |
|           |                |                         |           | shared   | 19q13.42-19q13.43 | 2 LOH     | 2 LOH     |
|           |                |                         |           | shared   | 19q13.43          | 3         | 3         |
|           |                |                         |           | shared   | 20                | 3         | 3         |
|           |                |                         |           | shared   | 21                | 3         | 3         |
|           |                |                         |           | unshared | 12p13.33-12p13.31 | 1         | 2         |
|           |                |                         |           | unshared | 12p13.2-12p11.21  | 1         | 2         |
| <b>46</b> | <b>Treated</b> | <b>Iliac crest left</b> | <b>L4</b> | shared   | 1p36.33-1q12      | 3         | 3         |
|           |                |                         |           | shared   | 1q12-1q44         | 5         | 5         |
|           |                |                         |           | shared   | 2                 | 4         | 4         |
|           |                |                         |           | shared   | 3                 | 4         | 4         |
|           |                |                         |           | shared   | 4                 | 4         | 4         |
|           |                |                         |           | shared   | 5                 | 4         | 4         |
|           |                |                         |           | shared   | 6                 | 4         | 4         |
|           |                |                         |           | shared   | 7                 | 4         | 4         |
|           |                |                         |           | shared   | 8                 | 4         | 4         |
|           |                |                         |           | shared   | 9                 | 4         | 4         |
|           |                |                         |           | shared   | 10p15.3-10q24.32  | 4         | 4         |
|           |                |                         |           | shared   | 10q24.32          | 3         | 3         |
|           |                |                         |           | shared   | 10q24.32-10q26.3  | 4         | 4         |
|           |                |                         |           | shared   | 11                | 4         | 4         |
|           |                |                         |           | shared   | 12                | 4         | 4         |
|           |                |                         |           | shared   | 13                | 4         | 4         |
|           |                |                         |           | shared   | 14                | 4         | 4         |
|           |                |                         |           | shared   | 15                | 4         | 4         |
|           |                |                         |           | shared   | 16p13.3           | 4         | 4         |
|           |                |                         |           | shared   | 16p13.3           | 3         | 3         |

| PID | Time point | RNAS             | FNAS         | Type                             | Region            | Copy RNAS | Copy FNAS |
|-----|------------|------------------|--------------|----------------------------------|-------------------|-----------|-----------|
|     |            |                  |              | shared                           | 16p13.3-16q22.1   | 4         | 4         |
|     |            |                  |              | shared                           | 16q22.1-16q22.2   | 3         | 3         |
|     |            |                  |              | shared                           | 16q22.2-16q24.3   | 4         | 4         |
|     |            |                  |              | shared                           | 17                | 4         | 4         |
|     |            |                  |              | shared                           | 18                | 4         | 4         |
|     |            |                  |              | shared                           | 19p13.3           | 6         | 6         |
|     |            |                  |              | shared                           | 19p13.3-19p13.2   | 5         | 5         |
|     |            |                  |              | shared                           | 19p13.2-19q13.33  | 4         | 4         |
|     |            |                  |              | shared                           | 19q13.33-19q13.43 | 3         | 3         |
|     |            |                  |              | shared                           | 20p13-20p11.1     | 4         | 4         |
|     |            |                  |              | shared                           | 20p11.1-20q11.21  | 6         | 6         |
|     |            |                  |              | shared                           | 20q11.21-20q13.33 | 4         | 4         |
|     |            |                  |              | shared                           | 21                | 4         | 4         |
|     |            |                  |              | shared                           | 22                | 4         | 4         |
|     |            |                  |              | unshared                         | -                 | -         | -         |
|     |            |                  |              |                                  |                   |           |           |
| 47  | Treated    | Iliac crest left | Sacrum right | shared (minor sub-clone in RNAS) | 1p33-1p32.3       | 1         | 1         |
|     |            |                  |              | shared                           | 1p31.1-1p13.1     | 1         | 1         |
|     |            |                  |              | shared                           | 1p11.2-1q44       | 3         | 3         |
|     |            |                  |              | shared                           | 2q23.3-2q32.1     | 1         | 1         |
|     |            |                  |              | shared                           | 3q13.11-3q21.3    | 1         | 1         |
|     |            |                  |              | shared                           | 3q21.3-3q26.31    | 2 LOH     | 2 LOH     |
|     |            |                  |              | shared                           | 3q26.31-3q26.32   | 1         | 1         |
|     |            |                  |              | shared                           | 3q26.32           | 0         | 0         |
|     |            |                  |              | shared                           | 3q26.32-3q29      | 1         | 1         |
|     |            |                  |              | shared                           | 5q14.3-5q31.1     | 1         | 1         |
|     |            |                  |              | shared                           | 5q31.2-5q35.3     | 1         | 1         |
|     |            |                  |              | shared                           | 7p21.2-7p21.1     | 1         | 1         |
|     |            |                  |              | shared                           | 8p23.3-8p11.21    | 1         | 1         |
|     |            |                  |              | shared                           | 12p13.33-12p11.22 | 1         | 1         |
|     |            |                  |              | shared                           | 13                | 1         | 1         |
|     |            |                  |              | shared                           | 15                | 3         | 3         |
|     |            |                  |              | shared                           | 20p11.1-20q13.33  | 3         | 3         |
|     |            |                  |              | shared                           | 22                | 1         | 1         |
|     |            |                  |              | unshared                         | 19q11-19q13.2     | 1         | 2         |
|     |            |                  |              |                                  |                   |           |           |
| 48  | Treated    | Iliac crest left | Ischium left | shared                           | 1q21.1-1q44       | 3         | 3         |
|     |            |                  |              | shared                           | 3q11.1-3q29       | 3         | 3         |
|     |            |                  |              | shared                           | 4q11-4q35.2       | 3         | 3         |
|     |            |                  |              | shared                           | 5                 | 3         | 3         |
|     |            |                  |              | shared                           | 6p25.3-6q13       | 3         | 3         |
|     |            |                  |              | shared                           | 6q13-6q27         | 2 LOH     | 2 LOH     |
|     |            |                  |              | shared                           | 9q12-9q34.3       | 3         | 3         |
|     |            |                  |              | shared                           | 10q11.21-10q26.3  | 3         | 3         |

| PID | Time point | RNAS             | FNAS                  | Type                              | Region                                   | Copy RNAS | Copy FNAS |
|-----|------------|------------------|-----------------------|-----------------------------------|------------------------------------------|-----------|-----------|
|     |            |                  |                       | shared                            | 11p15.5-11q22.3                          | 3         | 3         |
|     |            |                  |                       | shared                            | 11q23.1-11q23.3                          | 3         | 3         |
|     |            |                  |                       | shared                            | 11q23.3-11q24.2                          | 4         | 4         |
|     |            |                  |                       | shared                            | 11q24.2-11q24.3                          | 3         | 3         |
|     |            |                  |                       | shared                            | 11q24.3-11q25                            | 2 LOH     | 2 LOH     |
|     |            |                  |                       | shared                            | 11q25                                    | 3         | 3         |
|     |            |                  |                       | shared                            | 13q11-13q13.3                            | 1         | 1         |
|     |            |                  |                       | shared                            | 13q14.11-13q34                           | 1         | 1         |
|     |            |                  |                       | shared                            | 14q32.33-14q32.33                        | 1         | 1         |
|     |            |                  |                       | shared                            | 15                                       | 3         | 3         |
|     |            |                  |                       | shared                            | 19                                       | 4         | 4         |
|     |            |                  |                       | unshared                          | -                                        | -         | -         |
|     |            |                  |                       |                                   |                                          |           |           |
|     |            | Iliac crest left | Ilium left            | shared                            | Like ischium left                        | -         | -         |
|     |            |                  |                       | unshared                          | -                                        | -         | -         |
|     |            |                  |                       |                                   |                                          |           |           |
|     |            | Iliac crest left | T8                    | shared                            | Like ischium left except chr 1, 6 and 19 |           |           |
|     |            |                  |                       | shared<br>(minor sub-clone at T8) | 6p25.3-6q13                              | 3         | 3         |
|     |            |                  |                       | additional shared                 | 19p13.3-19q13.43                         | 4         | 4         |
|     |            |                  |                       | unshared                          | 1q21.1-1q44                              | 3         | 4         |
|     |            |                  |                       | unshared                          | 17q12-17q25.3                            | 2         | 3         |
|     |            |                  |                       | unshared                          | 19p13.3                                  | 4         | 3         |
|     |            |                  |                       |                                   |                                          |           |           |
| 49  | Treated    | Iliac crest left | Right chest wall mass | shared                            | 1p33-1p21.3                              | 1         | 1         |
|     |            |                  |                       | shared                            | 1q21.1                                   | 3 LOH     | 3 LOH     |
|     |            |                  |                       | shared                            | 1q21.1-1q44                              | 3         | 3         |
|     |            |                  |                       | shared                            | 2                                        | 2 LOH     | 2 LOH     |
|     |            |                  |                       | shared                            | 4q28.1-4q35.2                            | 3         | 3         |
|     |            |                  |                       | shared                            | 5p15.33-5p14.1                           | 4         | 4         |
|     |            |                  |                       | shared                            | 5p14.1-5p12                              | 3         | 3         |
|     |            |                  |                       | shared                            | 5p12-5q11.1                              | 4         | 4         |
|     |            |                  |                       | shared                            | 5q11.1-5q11.2                            | 3         | 3         |
|     |            |                  |                       | shared                            | 5q34-5q35.3                              | 3         | 3         |
|     |            |                  |                       | shared                            | 7p22.3                                   | 4         | 4         |
|     |            |                  |                       | shared                            | 7q22.3-7q31.1                            | 3         | 3         |
|     |            |                  |                       | shared                            | 7q31.1-7q36.3                            | 4         | 4         |
|     |            |                  |                       | shared                            | 8q11.21-8q23.3                           | 3         | 3         |
|     |            |                  |                       | shared                            | 8q23.3-8q24.12                           | 2 LOH     | 2 LOH     |
|     |            |                  |                       | shared                            | 8q24.13-8q24.22                          | 3         | 3         |
|     |            |                  |                       | shared                            | 8q24.22                                  | 2 LOH     | 2 LOH     |
|     |            |                  |                       | shared                            | 8q24.22-8q24.3                           | 3         | 3         |
|     |            |                  |                       | shared                            | 9p13.3-9p11.2                            | 3         | 3         |
|     |            |                  |                       | shared                            | 9q12-9q34.3                              | 2 LOH     | 2 LOH     |



| PID       | Time point     | RNAS                     | FNAS              | Type                              | Region                               | Copy RNAS | Copy FNAS |
|-----------|----------------|--------------------------|-------------------|-----------------------------------|--------------------------------------|-----------|-----------|
|           |                |                          |                   | shared                            | 12p13.33-12p11.1                     | 4         | 4         |
|           |                |                          |                   | shared                            | 12q11-12q24.33                       | 3         | 3         |
|           |                |                          |                   | shared                            | 13                                   | 1         | 1         |
|           |                |                          |                   | shared                            | 14q32.33                             | 1         | 1         |
|           |                |                          |                   | shared                            | 15q11.1-15q14                        | 3         | 3         |
|           |                |                          |                   | shared                            | 19p13.3-19q12                        | 3         | 3         |
|           |                |                          |                   | unshared                          | 11q12.1-q12.3                        | 2         | 3         |
|           |                |                          |                   |                                   |                                      |           |           |
| <b>50</b> | <b>Treated</b> | <b>Iliac crest right</b> | <b>L2</b>         | shared                            | 1q21.3-1q22                          | 3         | 3         |
|           |                |                          |                   | shared<br>(minor sub-clone at L2) | 2p25.3-2p23.3                        | 1         | 1         |
|           |                |                          |                   | shared                            | 4q31.3-4q35.2                        | 3         | 3         |
|           |                |                          |                   | shared                            | 5                                    | 3         | 3         |
|           |                |                          |                   | shared<br>(minor sub-clone at L2) | 6p24.3-6p21.1                        | 3         | 3         |
|           |                |                          |                   | shared                            | 7p22.3-7q21.12                       | 3         | 3         |
|           |                |                          |                   | shared                            | 7q21.12-7q21.13                      | 4         | 4         |
|           |                |                          |                   | shared                            | 7q21.13-7q36.3                       | 3         | 3         |
|           |                |                          |                   | shared                            | 8p23.3-8p21.1                        | 1         | 1         |
|           |                |                          |                   | shared                            | 9p24.3-9p11.2                        | 4         | 4         |
|           |                |                          |                   | shared                            | 11p11.12-11q25                       | 3         | 3         |
|           |                |                          |                   | shared                            | 15                                   | 4         | 4         |
|           |                |                          |                   | shared                            | 18                                   | 1         | 1         |
|           |                |                          |                   | shared                            | 19                                   | 3         | 3         |
|           |                |                          |                   | shared                            | 21                                   | 3         | 3         |
|           |                |                          |                   | unshared                          | 9q                                   | 4         | 3         |
|           |                |                          |                   | unshared                          | 11p15.5-11p11.12                     | 3         | 2         |
|           |                |                          |                   |                                   |                                      |           |           |
|           |                | <b>Iliac crest right</b> | <b>Ilium left</b> | shared                            | <b>Like L2 except chr9 and chr11</b> |           |           |
|           |                |                          |                   | additional shared                 | 9                                    | 4         | 4         |
|           |                |                          |                   | additional shared                 | 11                                   | 3         | 3         |
|           |                |                          |                   | unshared                          | -                                    | -         | -         |
|           |                |                          |                   |                                   |                                      |           |           |
| <b>51</b> | <b>Treated</b> | <b>Iliac crest right</b> | <b>T12</b>        | shared                            | 1p32.3                               | 1         | 1         |
|           |                |                          |                   | shared                            | 2p16.2-2p16.1                        | 1         | 1         |
|           |                |                          |                   | shared                            | 2p12-2p11.2                          | 1         | 1         |
|           |                |                          |                   | shared                            | 2p11.2-2p11.1                        | 2 LOH     | 2 LOH     |
|           |                |                          |                   | shared                            | 3                                    | 3         | 3         |
|           |                |                          |                   | shared                            | 4p16.3-4p15.2                        | 1         | 1         |
|           |                |                          |                   | shared                            | 5p15.33-5p15.31                      | 3         | 3         |
|           |                |                          |                   | shared                            | 6q14.1                               | 1         | 1         |
|           |                |                          |                   | shared                            | 6q15-6q16.1                          | 1         | 1         |

| PID | Time point | RNAS | FNAS | Type     | Region            | Copy RNAS | Copy FNAS |
|-----|------------|------|------|----------|-------------------|-----------|-----------|
|     |            |      |      | shared   | 6q16.2-6q27       | 1         | 1         |
|     |            |      |      | shared   | 9p24.3-9p24.1     | 1         | 1         |
|     |            |      |      | shared   | 9p24.1            | 3         | 3         |
|     |            |      |      | shared   | 9p23              | 1         | 1         |
|     |            |      |      | shared   | 9p22.3-9p22.2     | 1         | 1         |
|     |            |      |      | shared   | 9p22.1-9p21.1     | 1         | 1         |
|     |            |      |      | shared   | 9p13.3-9p13.2     | 3         | 3         |
|     |            |      |      | shared   | 10q24.1-10q25.1   | 1         | 1         |
|     |            |      |      | shared   | 11p15.5-11q14.3   | 4         | 4         |
|     |            |      |      | shared   | 11q14.3-11q21     | 3         | 3         |
|     |            |      |      | shared   | 11q21-11q25       | 4         | 4         |
|     |            |      |      | shared   | 12p13.33-12p11.21 | 1         | 1         |
|     |            |      |      | shared   | 12q13.11-12q13.2  | 1         | 1         |
|     |            |      |      | shared   | 12q21.31-12q21.32 | 1         | 1         |
|     |            |      |      | shared   | 12q24.21-12q24.23 | 1         | 1         |
|     |            |      |      | shared   | 12q24.31-12q24.33 | 1         | 1         |
|     |            |      |      | shared   | 13q13.1-13q13.3   | 1         | 1         |
|     |            |      |      | shared   | 13q13.3-13q14.11  | 1         | 1         |
|     |            |      |      | shared   | 13q14.11          | 2 LOH     | 2 LOH     |
|     |            |      |      | shared   | 13q14.11-13q21.2  | 1         | 1         |
|     |            |      |      | shared   | 13q21.2           | 2 LOH     | 2 LOH     |
|     |            |      |      | shared   | 13q21.2-13q34     | 3         | 3         |
|     |            |      |      | shared   | 14q22.1-14q22.3   | 1         | 1         |
|     |            |      |      | shared   | 14q32.2           | 1         | 1         |
|     |            |      |      | shared   | 15q14-15q26.3     | 3         | 3         |
|     |            |      |      | shared   | 16p13.3-16p13.12  | 1         | 1         |
|     |            |      |      | shared   | 16p12.3-16p12.1   | 3         | 3         |
|     |            |      |      | shared   | 16p12.1           | 1         | 1         |
|     |            |      |      | shared   | 16q11.2-16q24.3   | 1         | 1         |
|     |            |      |      | shared   | 17p13.3-17q11.2   | 1         | 1         |
|     |            |      |      | shared   | 19p13.3-19p13.11  | 3         | 3         |
|     |            |      |      | shared   | 19p13.11-19q13.2  | 2 LOH     | 2 LOH     |
|     |            |      |      | shared   | 19q13.2-19q13.43  | 3         | 3         |
|     |            |      |      | shared   | 22q11.1-22q11.21  | 1         | 1         |
|     |            |      |      | shared   | 22q11.21-22q12.3  | 1         | 1         |
|     |            |      |      | shared   | 22q13.1-22q13.33  | 1         | 1         |
|     |            |      |      | unshared | -                 | -         | -         |

Abbreviations: RNAS: random aspirate, FNAS: fine needle aspirate, Copy: copy number at indicated region; LOH: loss of heterozygosity
