# Supplementary material for: Spatial genomic heterogeneity in multiple myeloma revealed by multi-region sequencing
Source: PubMed Central journal article supplement (PMC5559527; doi:10.1038/s41467-017-00296-y), 2017-08-16
Supplement: 41467_2017_296_MOESM4_ESM.pdf [file 41467_2017_296_MOESM4_ESM.pdf]

**Supplementary Data 3: Number of non-silent mutations.**

| <b>PID</b> | <b>Time</b> | <b>Total mutations<br/>[≥5% VAF]</b> | <b>Sub-clonal unshared<br/>mutations<br/>[0.20≤CCF&lt;0.80]</b> | <b>Clonal unshared<br/>mutations<br/>[CCF≥0.80]</b> | <b>Shared-diff<br/>mutations<br/>[CCF≥0.20]</b> |
|------------|-------------|--------------------------------------|-----------------------------------------------------------------|-----------------------------------------------------|-------------------------------------------------|
| 1          | Baseline    | 56                                   | 9                                                               | 20                                                  | 15                                              |
| 2          | Baseline    | 50                                   | 18                                                              | 4                                                   | 14                                              |
| 3          | Baseline    | 45                                   | 18                                                              | 5                                                   | 6                                               |
| 4          | Baseline    | 113                                  | 35                                                              | 31                                                  | 5                                               |
| 5          | Baseline    | 57                                   | 6                                                               | 4                                                   | 15                                              |
| 6          | Baseline    | 46                                   | 11                                                              | 4                                                   | 5                                               |
| 7          | Baseline    | 49                                   | 10                                                              | 11                                                  | 0                                               |
| 8          | Baseline    | 59                                   | 4                                                               | 20                                                  | 1                                               |
| 9          | Baseline    | 46                                   | 5                                                               | 1                                                   | 13                                              |
| 10         | Baseline    | 56                                   | 7                                                               | 0                                                   | 14                                              |
| 11         | Baseline    | 46                                   | 14                                                              | 0                                                   | 3                                               |
| 12         | Baseline    | 55                                   | 4                                                               | 14                                                  | 2                                               |
| 13         | Baseline    | 59                                   | 5                                                               | 0                                                   | 15                                              |
| 14         | Baseline    | 65                                   | 7                                                               | 6                                                   | 9                                               |
| 15         | Baseline    | 62                                   | 16                                                              | 3                                                   | 0                                               |
| 16         | Baseline    | 46                                   | 6                                                               | 2                                                   | 3                                               |
| 17         | Baseline    | 58                                   | 8                                                               | 0                                                   | 5                                               |
| 18         | Baseline    | 50                                   | 5                                                               | 4                                                   | 1                                               |
| 19         | Baseline    | 120                                  | 11                                                              | 11                                                  | 2                                               |
| 20         | Baseline    | 55                                   | 6                                                               | 4                                                   | 0                                               |
| 21         | Baseline    | 20                                   | 1                                                               | 0                                                   | 2                                               |
| 22         | Baseline    | 435                                  | 59                                                              | 0                                                   | 5                                               |
| 23         | Baseline    | 41                                   | 5                                                               | 1                                                   | 0                                               |
| 24         | Baseline    | 50                                   | 2                                                               | 0                                                   | 5                                               |
| 25         | Baseline    | 40                                   | 0                                                               | 0                                                   | 5                                               |
| 26         | Baseline    | 19                                   | 1                                                               | 0                                                   | 1                                               |
| 27         | Baseline    | 51                                   | 2                                                               | 0                                                   | 2                                               |
| 28         | Baseline    | 72                                   | 2                                                               | 2                                                   | 1                                               |
| 29         | Baseline    | 87                                   | 4                                                               | 0                                                   | 2                                               |
| 30         | Baseline    | 34                                   | 2                                                               | 0                                                   | 0                                               |
| 31         | Baseline    | 94                                   | 1                                                               | 0                                                   | 4                                               |
| 32         | Baseline    | 40                                   | 0                                                               | 0                                                   | 2                                               |
| 33         | Baseline    | 41                                   | 1                                                               | 0                                                   | 1                                               |
| 34         | Baseline    | 97                                   | 3                                                               | 0                                                   | 0                                               |
| 35         | Baseline    | 37                                   | 0                                                               | 0                                                   | 1                                               |
| 36         | Baseline    | 63                                   | 0                                                               | 0                                                   | 1                                               |
| 37         | Baseline    | 30                                   | 0                                                               | 0                                                   | 0                                               |
| 38         | Baseline    | 21                                   | 0                                                               | 0                                                   | 0                                               |
| 39         | Baseline    | 84                                   | 0                                                               | 0                                                   | 0                                               |
| 40         | Baseline    | 34                                   | 0                                                               | 0                                                   | 0                                               |
| 41         | Baseline    | 46                                   | 0                                                               | 0                                                   | 0                                               |
| 42         | Baseline    | 47                                   | 0                                                               | 0                                                   | 0                                               |

| <b>PID</b> | <b>Time</b> | <b>Total mutations<br/>[≥5% VAF]</b> | <b>Sub-clonal unshared<br/>mutations<br/>[0.20≤CCF&lt;0.80]</b> | <b>Clonal unshared<br/>mutations<br/>[CCF≥0.80]</b> | <b>Shared-diff<br/>mutations<br/>[CCF≥0.20]</b> |
|------------|-------------|--------------------------------------|-----------------------------------------------------------------|-----------------------------------------------------|-------------------------------------------------|
| 28         | Treated     | 82                                   | 6                                                               | 0                                                   | 1                                               |
| 32         | Treated     | 33                                   | 3                                                               | 0                                                   | 0                                               |
| 43         | Treated     | 97                                   | 26                                                              | 15                                                  | 25                                              |
| 44         | Treated     | 79                                   | 7                                                               | 35                                                  | 3                                               |
| 45         | Treated     | 58                                   | 9                                                               | 0                                                   | 0                                               |
| 46         | Treated     | 186                                  | 5                                                               | 0                                                   | 15                                              |
| 47         | Treated     | 52                                   | 4                                                               | 0                                                   | 0                                               |
| 48         | Treated     | 400                                  | 11                                                              | 12                                                  | 1                                               |
| 49         | Treated     | 78                                   | 2                                                               | 0                                                   | 1                                               |
| 50         | Treated     | 40                                   | 0                                                               | 0                                                   | 1                                               |
| 51         | Treated     | 104                                  | 0                                                               | 0                                                   | 0                                               |

Abbreviations: VAF: variant allele frequency; CCF: cancer clonal fraction
