# Supplementary material for: Spatial genomic heterogeneity in multiple myeloma revealed by multi-region sequencing
Source: PubMed Central journal article supplement (PMC5559527; doi:10.1038/s41467-017-00296-y), 2017-08-16
Supplement: 41467_2017_296_MOESM5_ESM.pdf [file 41467_2017_296_MOESM5_ESM.pdf]

**Supplementary Data 4: Previous therapies for “Treated patients”**

| PID | Diagnosis (year) | Previous Therapies                                                                                                                                                                                                                 |
|-----|------------------|------------------------------------------------------------------------------------------------------------------------------------------------------------------------------------------------------------------------------------|
| 28  | 2014             | up-front metronomic therapy                                                                                                                                                                                                        |
| 32  | 2014             | 2 x MVDT PACE                                                                                                                                                                                                                      |
| 43  | 2003             | DT-PACE<br>Melphalan with ASCT<br>BEAM with ASCT<br>DT-PACE consolidation<br>Thal/Dex<br>1. <i>Relapse</i><br>VTD<br>2. <i>Relapse</i><br>Pom<br>3. <i>Relapse</i><br>CFZ/Dex<br>4. <i>Relapse</i><br>metronomic, Arsenic trioxide |
| 44  | 2012             | Radiation therapy<br>MVTD PACE<br>Melphalan with ASCT<br>VRD                                                                                                                                                                       |
| 45  | 2009             | VTD<br>VTDSPACE<br>1. <i>Relapse</i><br>CFZ/Dex<br>CRD<br>Progression<br>CFZ/Arsenic/Pom/Atra/Dex                                                                                                                                  |
| 46  | 2003             | DT-PACE<br>2 x Melphalan with ASCT<br>VTD consolidation                                                                                                                                                                            |
| 47  | 2011             | MVTD PACE<br>2 x Melphalan with ASCT<br>VRD consolidation                                                                                                                                                                          |
| 48  | 2012             | VRD<br>Radiation therapy<br>CFZ/Dex                                                                                                                                                                                                |
| 49  | 2009             | MVTD PACE<br>Melphalan with ASCT<br>VRD consolidation<br>1. <i>Relapse</i><br>Metronomic therapy<br>2. <i>Relapse</i><br>Trametinib<br>3. <i>Relapse</i> :<br>Trametinib/Pom/Dex                                                   |
| 50  | 2006             | DT-PACE<br>Melphalan/VTD + ASCT<br>Thal<br>VDSPACE consolidation                                                                                                                                                                   |

| PID | Diagnosis (year) | Previous Therapies                                                        |
|-----|------------------|---------------------------------------------------------------------------|
|     |                  | Thal<br>1. Relapse<br>VDT<br>Len/Dex                                      |
| 51  | 2004             | VDT-PACE<br>2 x Melphalan with ASCT<br>VTD<br>Thal 50mg + Dex 20mg<br>Len |

Abbreviations: Dex: Dexamethasone; (V)DTPAC(E): (Bortezomib) Dexamethasone, Thalidomide, Cisplatin, Doxorubicin, Cyclophosphamide, (Etoposide); ASCT: autologous stem cell transplantation; Pom: Pomalidomide; CFZ: Carfilzomib; Metronomic therapy: Doxorubicin&Cisplatin as continuous 24-h intravenous infusion for 16 days plus Bortezomib, Thalidomide: Dexamethasone; Len: Lenalidomide; MVDT: Melphalan/VTD; CRD: Carfilzomib, Lenalidomide, Dexamethasone
