# Supplementary material for: Spatial genomic heterogeneity in multiple myeloma revealed by multi-region sequencing
Source: PubMed Central journal article supplement (PMC5559527; doi:10.1038/s41467-017-00296-y), 2017-08-16
Supplement: 41467_2017_296_MOESM6_ESM.pdf [file 41467_2017_296_MOESM6_ESM.pdf]

**Supplementary Data 5: Identification of evolutionary dynamics in multiple myeloma.**

| PID | Type   | Mutations [≥5% VAF] | Mutations [VAF 0.12-0.24] | R <sup>2</sup> | Unshared mutations [CCF≥0.8] | Shared-diff mutations [CCF≥0.8] |
|-----|--------|---------------------|---------------------------|----------------|------------------------------|---------------------------------|
| 1   | FNAS   | 90                  | 5                         | -              | 25                           | 27                              |
| 1   | RNAS   | 48                  | 5                         | -              | 7                            | 0                               |
| 2   | FNAS   | 71                  | 7                         | -              | 2                            | 33                              |
| 2   | RNAS   | 89                  | 15                        | 0.92           | 8                            | 0                               |
| 3   | FNAS   | 49                  | 2                         | -              | 12                           | 10                              |
| 3   | RNAS   | 57                  | 29                        | 0.94           | 0                            | 0                               |
| 4   | FNAS   | 143                 | 25                        | 0.57           | 54                           | 11                              |
| 4   | RNAS   | 128                 | 36                        | 0.87           | 7                            | 0                               |
| 5   | FNAS   | 128                 | 15                        | 0.92           | 9                            | 26                              |
| 5   | RNAS   | 54                  | 10                        | -              | 0                            | 0                               |
| 6   | FNAS   | 53                  | 7                         | -              | 6                            | 8                               |
| 6   | RNAS   | 63                  | 13                        | 0.92           | 0                            | 0                               |
| 7   | FNAS 1 | 44                  | 3                         | -              | 8                            | 0                               |
| 7   | FNAS 2 | 44                  | 9                         | -              | 9                            | 0                               |
| 7   | RNAS   | 45                  | 5                         | -              | 1                            | 0                               |
| 8   | FNAS 1 | 59                  | 0                         | -              | 3                            | 0                               |
| 8   | FNAS 2 | 63                  | 1                         | -              | 11                           | 1                               |
| 8   | FNAS 3 | 75                  | 1                         | -              | 11                           | 1                               |
| 8   | RNAS   | 69                  | 5                         | -              | 6                            | 0                               |
| 9   | FNAS   | 64                  | 14                        | 0.88           | 1                            | 1                               |
| 9   | RNAS   | 61                  | 7                         | -              | 0                            | 0                               |
| 10  | FNAS   | 85                  | 20                        | 0.97           | 0                            | 4                               |
| 10  | RNAS   | 63                  | 5                         | -              | 1                            | 3                               |
| 11  | FNAS   | 82                  | 19                        | 0.96           | 0                            | 0                               |
| 11  | RNAS   | 60                  | 13                        | 0.68           | 0                            | 0                               |
| 12  | FNAS 1 | 64                  | 4                         | -              | 14                           | 3                               |
| 12  | FNAS 2 | 62                  | 4                         | -              | 9                            | 1                               |
| 12  | FNAS 3 | 62                  | 5                         | -              | 9                            | 2                               |
| 12  | FNAS 4 | 64                  | 5                         | -              | 10                           | 3                               |
| 12  | RNAS   | 63                  | 25                        | 0.64           | 5                            | 0                               |
| 13  | FNAS   | 68                  | 2                         | -              | 0                            | 5                               |
| 13  | RNAS   | 85                  | 15                        | 0.8            | 0                            | 5                               |
| 14  | FNAS   | 78                  | 0                         | -              | 12                           | 10                              |
| 14  | RNAS   | 88                  | 28                        | 0.9            | 0                            | 0                               |
| 15  | FNAS 1 | 68                  | 6                         | -              | 4                            | 3                               |
| 15  | FNAS 2 | 69                  | 9                         | -              | 2                            | 2                               |
| 15  | RNAS   | 95                  | 27                        | 0.97           | 0                            | 0                               |
| 16  | FNAS   | 62                  | 3                         | -              | 3                            | 3                               |
| 16  | RNAS   | 77                  | 6                         | -              | 0                            | 0                               |
| 17  | FNAS   | 99                  | 13                        | 0.95           | 0                            | 0                               |
| 17  | RNAS   | 56                  | 28                        | 0.89           | 0                            | 0                               |
| 18  | FNAS   | 68                  | 7                         | -              | 9                            | 0                               |

| PID | Type   | Mutations [≥5% VAF] | Mutations [VAF 0.12-0.24] | R <sup>2</sup> | Unshared mutations [CCF≥0.8] | Shared-diff mutations [CCF≥0.8] |
|-----|--------|---------------------|---------------------------|----------------|------------------------------|---------------------------------|
| 18  | RNAS   | 62                  | 12                        | 0.73           | 0                            | 0                               |
| 19  | FNAS   | 205                 | 8                         | -              | 22                           | 7                               |
| 19  | RNAS   | 191                 | 22                        | 0.75           | 5                            | 0                               |
| 20  | FNAS 1 | 88                  | 15                        | 0.64           | 6                            | 2                               |
| 20  | FNAS 2 | 93                  | 13                        | 0.87           | 0                            | 0                               |
| 20  | FNAS 3 | 86                  | 8                         | -              | 0                            | 0                               |
| 20  | RNAS   | 90                  | 8                         | -              | 0                            | 0                               |
| 21  | FNAS   | 29                  | 2                         | -              | 0                            | 0                               |
| 21  | RNAS   | 31                  | 1                         | -              | 0                            | 0                               |
| 22  | FNAS   | 773                 | 463                       | 0.87           | 0                            | 0                               |
| 22  | RNAS   | 716                 | 65                        | 0.9            | 0                            | 0                               |
| 23  | FNAS   | 71                  | 3                         | -              | 2                            | 0                               |
| 23  | RNAS   | 77                  | 13                        | 0.72           | 0                            | 0                               |
| 24  | FNAS   | 80                  | 13                        | 0.8            | 0                            | 0                               |
| 24  | RNAS   | 80                  | 9                         | -              | 0                            | 2                               |
| 25  | FNAS 1 | 72                  | 8                         | -              | 0                            | 0                               |
| 25  | FNAS 2 | 70                  | 16                        | 0.93           | 0                            | 0                               |
| 25  | FNAS 3 | 71                  | 17                        | 0.92           | 0                            | 0                               |
| 25  | RNAS   | 66                  | 12                        | 0.9            | 0                            | 0                               |
| 26  | FNAS   | 33                  | 2                         | -              | 0                            | 4                               |
| 26  | RNAS   | 35                  | 1                         | -              | 0                            | 0                               |
| 27  | FNAS   | 77                  | 18                        | 0.91           | 0                            | 0                               |
| 27  | RNAS   | 74                  | 13                        | 0.97           | 0                            | 0                               |
| 28  | FNAS 1 | 50                  | 2                         | -              | 1                            | 1                               |
| 28  | FNAS 2 | 50                  | 0                         | -              | 1                            | 0                               |
| 28  | RNAS   | 46                  | 3                         | -              | 0                            | 0                               |
| 29  | FNAS   | 166                 | 27                        | 0.76           | 0                            | 0                               |
| 29  | RNAS   | 141                 | 36                        | 0.78           | 0                            | 0                               |
| 30  | FNAS   | 63                  | 2                         | -              | 0                            | 1                               |
| 30  | RNAS   | 73                  | 5                         | -              | 1                            | 1                               |
| 31  | FNAS 1 | 87                  | 3                         | -              | 0                            | 0                               |
| 31  | FNAS 2 | 165                 | 6                         | -              | 0                            | 0                               |
| 31  | FNAS 3 | 144                 | 6                         | -              | 0                            | 0                               |
| 31  | RNAS   | 99                  | 6                         | -              | 0                            | 0                               |
| 32  | FNAS   | 56                  | 3                         | -              | 0                            | 0                               |
| 32  | RNAS   | 71                  | 14                        | 0.73           | 0                            | 0                               |
| 33  | FNAS   | 66                  | 4                         | -              | 0                            | 0                               |
| 33  | RNAS   | 62                  | 28                        | 0.85           | 0                            | 0                               |
| 34  | FNAS   | 124                 | 4                         | -              | 0                            | 0                               |
| 34  | RNAS   | 146                 | 11                        | -              | 0                            | 0                               |
| 35  | FNAS 1 | 57                  | 7                         | -              | 0                            | 0                               |
| 35  | FNAS 2 | 55                  | 8                         | -              | 0                            | 0                               |

| PID | Type | Mutations [≥5% VAF] | Mutations [VAF 0.12-0.24] | R <sup>2</sup> | Unshared mutations [CCF≥0.8] | Shared-diff mutations [CCF≥0.8] |
|-----|------|---------------------|---------------------------|----------------|------------------------------|---------------------------------|
| 35  | RNAS | 55                  | 7                         | -              | 0                            | 0                               |
| 36  | FNAS | 131                 | 0                         | -              | 0                            | 4                               |
| 36  | RNAS | 134                 | 7                         | -              | 0                            | 0                               |
| 37  | FNAS | 43                  | 2                         | -              | 0                            | 0                               |
| 37  | RNAS | 45                  | 2                         | -              | 0                            | 0                               |
| 38  | FNAS | 37                  | 3                         | -              | 0                            | 0                               |
| 38  | RNAS | 38                  | 6                         | -              | 0                            | 0                               |
| 39  | FNAS | 160                 | 2                         | -              | 0                            | 0                               |
| 39  | RNAS | 149                 | 1                         | -              | 0                            | 0                               |
| 40  | FNAS | 61                  | 1                         | -              | 0                            | 0                               |
| 40  | RNAS | 66                  | 8                         | -              | 0                            | 0                               |
| 41  | FNAS | 70                  | 15                        | 0.69           | 1                            | 0                               |
| 41  | RNAS | 64                  | 13                        | 0.69           | 0                            | 0                               |
| 42  | FNAS | 81                  | 16                        | 0.78           | 1                            | 0                               |
| 42  | RNAS | 86                  | 19                        | 0.88           | 0                            | 0                               |

Abbreviations: RNAS: random aspirate, FNAS: fine needle aspirate, VAF: variant allele frequency, CCF: cancer clonal fraction, R<sup>2</sup>: goodness-of-fit measure for cumulative distribution of subclonal mutations
