# Supplementary material for: Spatial genomic heterogeneity in multiple myeloma revealed by multi-region sequencing
Source: PubMed Central journal article supplement (PMC5559527; doi:10.1038/s41467-017-00296-y), 2017-08-16
Supplement: 41467_2017_296_MOESM7_ESM.pdf [file 41467_2017_296_MOESM7_ESM.pdf]

**Supplementary Data 6: Confirmation of unshared mutations by deep whole exome sequencing.**

| PID | Mutation            | Symbol  | Effect          | Change      | CCF  | Reads | Alternative reads |
|-----|---------------------|---------|-----------------|-------------|------|-------|-------------------|
| 3   | 1:11169374T>A       | MTOR    | missense        | Ile2501Phe  | 0.58 | 316   | not detectable    |
| 3   | 1:38484759A>G       | UTP11L  | missense        | His124Arg   | 0.55 | 328   | not detectable    |
| 3   | 1:112525054G>A      | KCND3   | missense        | Arg99Cys    | 1.00 | 896   | not detectable    |
| 3   | 2:179401215C>T      | TTN     | missense        | Gly33420Glu | 0.80 | 629   | 4                 |
| 3   | 3:78708951C>T       | ROBO1   | missense        | Ser776Asn   | 0.70 | 304   | not detectable    |
| 3   | 4:96046159C>T       | BMPR1B  | stop_gained     | Arg188*     | 0.48 | 329   | not detectable    |
| 3   | 7:156762366G>A      | NOM1    | missense        | Cys851Tyr   | 0.94 | 193   | not detectable    |
| 3   | 8:86048171G>A       | LRRCC1  | missense        | Val768Ile   | 0.58 | 221   | not detectable    |
| 3   | 8:145011190T>C      | PLEC    | missense        | Lys268Arg   | 0.30 | 1068  | not detectable    |
| 3   | 9:116811731C>T      | ZNF618  | missense        | Arg717Trp   | 0.58 | 833   | not detectable    |
| 3   | 10:89621877C>A      | KLLN    | missense        | Arg123Leu   | 1.02 | 665   | not detectable    |
| 3   | 11:1756516G>T       | IFITM10 | missense        | Asp227Glu   | 0.50 | 597   | not detectable    |
| 3   | 11:106888683C>G     | GUCY1A2 | missense        | Arg33Ser    | 0.39 | 510   | not detectable    |
| 3   | 12:52284640G>A      | ANKRD33 | missense        | Val304Ile   | 0.60 | 795   | not detectable    |
| 3   | 12:53493080C>A      | IGFBP6  | missense        | Leu122Ile   | 1.16 | 394   | not detectable    |
| 3   | 14:47426708C>T      | MDGA2   | missense        | Arg584Gln   | 0.52 | 305   | not detectable    |
| 3   | 17:42882299G>T      | GJC1    | missense        | Pro296Gln   | 0.32 | 546   | not detectable    |
| 3   | 17:74076670C>T      | ZACN    | missense        | Leu237Phe   | 0.40 | 969   | not detectable    |
| 3   | 17:76127689T>A      | TMC8    | missense        | Val7Glu     | 0.32 | 240   | not detectable    |
| 3   | 18:12344148C>T      | AFG3L2  | missense        | Ala588Thr   | 0.68 | 544   | not detectable    |
| 3   | 19:9074202G>C       | MUC16   | missense        | Thr4415Ser  | 0.38 | 489   | not detectable    |
| 3   | 21:46875781G>A      | COL18A1 | missense        | Glu113Lys   | 0.66 | 1039  | 2                 |
| 3   | 22:50312874G>T      | CRELD2  | splice_region   |             | 0.32 | 473   | not detectable    |
| 7   | 1:44878074C>A       | RNF220  | missense        | Pro102Gln   | 0.79 | 554   | not detectable    |
| 7   | 1:115252204C>T      | NRAS    | missense        | Ala146Thr   | 0.88 | 263   | not detectable    |
| 7   | 1:117208939A>T      | IGSF3   | missense        | Phe4Ile     | 0.83 | 248   | not detectable    |
| 7   | 1:163138061C>T      | RGS5    | missense        | Ala68Thr    | 0.81 | 417   | not detectable    |
| 7   | 1:222827749G>A      | MIA3    | missense        | Val1466Ile  | 0.79 | 297   | not detectable    |
| 7   | 2:42936062C>T       | MTA3    | missense        | Pro451Ser   | 0.20 | 308   | not detectable    |
| 7   | 2:179605986C>T      | TTN     | missense        | Gly3992Ser  | 0.96 | 558   | not detectable    |
| 7   | 5:7626355C>T        | ADCY2   | missense        | Leu216Phe   | 0.76 | 512   | not detectable    |
| 7   | 5:176562325G>C      | NSD1    | missense        | Arg74Thr    | 0.62 | 909   | not detectable    |
| 7   | 9:125622407T>A      | RC3H2   | missense        | Lys546Asn   | 1.17 | 417   | not detectable    |
| 7   | 10:88486007G>A      | LDB3    | missense        | Ala703Thr   | 0.63 | 529   | not detectable    |
| 7   | 12:57974872G>A      | KIF5A   | missense        | Arg891His   | 0.95 | 403   | not detectable    |
| 7   | 12:106715333G>T     | TCP11L2 | missense        | Asp162Tyr   | 0.89 | 320   | 2                 |
| 7   | 14:20843997T>G      | TEP1    | missense        | Lys2094Gln  | 0.85 | 263   | not detectable    |
| 7   | 14:93760431C>A      | BTBD7   | missense        | Arg312Ile   | 1.00 | 250   | not detectable    |
| 7   | 15:38235541G>A      | TMCO5A  | splice_acceptor |             | 0.71 | 409   | not detectable    |
| 7   | 15:42704306G>A      | CAPN3   | missense        | Arg156Gln   | 0.68 | 316   | 2                 |
| 7   | 17:7345197C>A       | FGF11   | stop_gained     | Ser136*     | 0.76 | 394   | not detectable    |
| 7   | 17:48650034G>A      | CACNA1G | missense        | Arg289His   | 0.92 | 314   | not detectable    |
| 7   | 19:11030322A>C      | CARM1   | missense        | Asn358His   | 0.30 | 488   | not detectable    |
| 7   | 19:40419732C>T      | FCGBP   | missense        | Val1088Met  | 1.09 | 305   | not detectable    |
| 8   | 1:182026286GCCTTC>G | ZNF648  | frameshift      | Lys286fs    | 0.91 | 303   | 3                 |

| PID | Mutation        | Symbol   | Effect          | Change     | CCF  | Reads | Alternative reads |
|-----|-----------------|----------|-----------------|------------|------|-------|-------------------|
| 8   | 1:247902614C>T  | OR14K1   | missense        | Ser233Phe  | 1.03 | 1180  | not detectable    |
| 8   | 2:3196197C>T    | TSSC1    | missense        | Arg353His  | 0.85 | 1064  | not detectable    |
| 8   | 2:141116507G>A  | LRP1B    | missense        | Leu3714Phe | 0.96 | 510   | not detectable    |
| 8   | 2:208632713A>T  | FZD5     | missense        | Ser251Thr  | 0.89 | 1311  | not detectable    |
| 8   | 3:17255764CT>C  | TBC1D5   | frameshift      | Asp585fs   | 0.88 | 690   | not detectable    |
| 8   | 3:191888370A>G  | FGF12    | missense        | Tyr164His  | 1.11 | 662   | not detectable    |
| 8   | 6:166307823C>CA | SDIM1    | frameshift      | Ala111fs   | 0.49 | 737   | not detectable    |
| 8   | 7:129098087T>G  | STRIP2   | missense        | Ile357Ser  | 1.00 | 897   | not detectable    |
| 8   | 7:140453145A>C  | BRAF     | missense        | Leu597Arg  | 0.82 | 516   | not detectable    |
| 8   | 10:98144406C>T  | TLL2     | missense        | Arg711His  | 0.36 | 645   | not detectable    |
| 8   | 10:115970624C>T | TDRD1    | missense        | Leu520Phe  | 0.83 | 701   | not detectable    |
| 8   | 11:3125479C>T   | OSBPL5   | missense        | Arg112His  | 1.01 | 1125  | not detectable    |
| 8   | 11:70331819C>T  | SHANK2   | missense        | Val1528Met | 0.87 | 1107  | not detectable    |
| 8   | 12:25398284C>A  | KRAS     | missense        | Gly12Val   | 0.91 | 484   | not detectable    |
| 8   | 12:58157886T>G  | CYP27B1  | missense        | Lys404Gln  | 1.09 | 1091  | not detectable    |
| 8   | 14:45414708G>A  | KLHL28   | missense        | Arg156Cys  | 0.73 | 504   | not detectable    |
| 8   | 14:103173833A>T | RCOR1    | missense        | His215Leu  | 0.95 | 352   | not detectable    |
| 8   | 17:3030793G>A   | OR1G1    | missense        | Ser18Phe   | 0.99 | 585   | not detectable    |
| 8   | 17:40474420C>A  | STAT3    | missense        | Asp661Tyr  | 0.91 | 938   | not detectable    |
| 8   | 17:40475367G>T  | STAT3    | missense        | Asn553Lys  | 0.93 | 634   | not detectable    |
| 8   | 19:43708102T>A  | PSG4     | missense        | Leu122Phe  | 0.94 | 1398  | not detectable    |
| 8   | 19:56545076G>A  | NLRP5    | splice_donor    |            | 1.00 | 702   | not detectable    |
| 8   | 20:37662863A>T  | DHX35    | missense        | Glu657Val  | 0.73 | 509   | not detectable    |
| 19  | 1:64120033C>T   | PGM1     | stop_gained     | Arg517*    | 0.70 | 425   | not detectable    |
| 19  | 2:86302386G>T   | POLR1A   | splice_region   |            | 0.70 | 248   | not detectable    |
| 19  | 2:98851110G>C   | VWA3B    | splice_acceptor |            | 0.34 | 193   | not detectable    |
| 19  | 2:242438827C>T  | STK25    | missense        | Ala144Thr  | 0.82 | 345   | not detectable    |
| 19  | 3:38892034T>C   | SCN11A   | missense        | Gln1422Arg | 0.67 | 521   | not detectable    |
| 19  | 3:130311929G>C  | COL6A6   | missense        | Asp1466His | 0.29 | 463   | not detectable    |
| 19  | 4:141560502A>C  | TBC1D9   | missense        | Asp806Glu  | 0.96 | 229   | not detectable    |
| 19  | 5:131607495G>T  | PDLIM4   | missense        | Gly228Trp  | 0.97 | 547   | not detectable    |
| 19  | 5:140516485T>A  | PCDHB5   | missense        | Leu490Gln  | 1.07 | 346   | not detectable    |
| 19  | 5:149214922A>G  | PPARGC1B | missense        | Thr601Ala  | 0.26 | 418   | not detectable    |
| 19  | 5:179306693C>T  | TBC1D9B  | missense        | Ala451Thr  | 0.82 | 273   | not detectable    |
| 19  | 7:87051441A>C   | ABCB4    | missense        | Leu771Arg  | 0.85 | 166   | not detectable    |
| 19  | 7:107872789G>T  | NRCAM    | missense        | Asn136Lys  | 0.91 | 388   | not detectable    |
| 19  | 10:104158183G>C | NFKB2    | missense        | Lys298Asn  | 0.24 | 604   | not detectable    |
| 19  | 11:67378589T>G  | NDUFV1   | missense        | Leu275Arg  | 0.91 | 919   | not detectable    |
| 19  | 16:1245505G>C   | CACNA1H  | missense        | Gly162Ala  | 0.92 | 402   | not detectable    |
| 19  | 17:38285680C>T  | MSL1     | missense        | Ser392Phe  | 0.47 | 193   | not detectable    |
| 19  | 18:8796244C>T   | SOGA2    | missense        | Pro489Ser  | 0.91 | 253   | not detectable    |
| 19  | 19:1627421C>T   | TCF3     | splice_acceptor | Lys50Lys   | 1.03 | 378   | not detectable    |
| 19  | 19:48821678T>A  | CCDC114  | missense        | Glu72Val   | 0.67 | 489   | not detectable    |
| 19  | 19:52394982C>T  | ZNF649   | missense        | Gly136Glu  | 0.23 | 599   | not detectable    |
| 19  | 19:54598512G>A  | OSCAR    | missense        | Arg260Cys  | 0.23 | 326   | not detectable    |

Abbreviations: PID: patient identification number, CCF: cancer clonal fraction in positive sample,

reads: total number of reads at respective site in negative sample,

alternative reads: number of reads indicating mutation at negative site (detection threshold of 2 reads).
